# Supplementary material for: ‘I also take part in caring for the sick child’: a qualitative study on fathers’ roles and responsibilities in seeking care for children in Southwest Ethiopia
Source: PubMed Central journal article supplement — BMJ Open. 2020 Aug 20;10(8):e038932. doi: 10.1136/bmjopen-2020-038932 (PMC7440706; doi:10.1136/bmjopen-2020-038932), 2020-08-20
Supplement: bmjopen-2020-038932.draft_revisions.pdf [file bmjopen-2020-038932.draft_revisions.pdf]

# BMJ Open

BMJ Open is committed to open peer review. As part of this commitment we make the peer review history of every article we publish publicly available.

When an article is published we post the peer reviewers' comments and the authors' responses online. We also post the versions of the paper that were used during peer review. These are the versions that the peer review comments apply to.

The versions of the paper that follow are the versions that were submitted during the peer review process. They are not the versions of record or the final published versions. They should not be cited or distributed as the published version of this manuscript.

BMJ Open is an open access journal and the full, final, typeset and author-corrected version of record of the manuscript is available on our site with no access controls, subscription charges or pay-per-view fees (<http://bmjopen.bmj.com>).

If you have any questions on BMJ Open's open peer review process please email [info.bmjopen@bmj.com](mailto:info.bmjopen@bmj.com)

# BMJ Open

## **“I also take part in caring for the sick child” - A qualitative study on fathers’ roles and responsibilities in seeking care for children in Southwest Ethiopia**

|                               |                                                                                                                                                                                                                                                                                                                                          |
|-------------------------------|------------------------------------------------------------------------------------------------------------------------------------------------------------------------------------------------------------------------------------------------------------------------------------------------------------------------------------------|
| Journal:                      | <i>BMJ Open</i>                                                                                                                                                                                                                                                                                                                          |
| Manuscript ID                 | bmjopen-2020-038932                                                                                                                                                                                                                                                                                                                      |
| Article Type:                 | Original research                                                                                                                                                                                                                                                                                                                        |
| Date Submitted by the Author: | 29-Mar-2020                                                                                                                                                                                                                                                                                                                              |
| Complete List of Authors:     | Funk, Tjede; Karolinska Institute, Global Public Health<br>Källander, Karin; Karolinska Institutet, Department of Global Public Health<br>Abebe, Ayalkibet; Malaria Consortium<br>Alfvén, Tobias ; Karolinska Institute, Department of Global Public Health<br>Alvesson, Helle; Karolinska Institute, Department of Global Public Health |
| Keywords:                     | Community child health < PAEDIATRICS, QUALITATIVE RESEARCH, PUBLIC HEALTH                                                                                                                                                                                                                                                                |
|                               |                                                                                                                                                                                                                                                                                                                                          |

SCHOLARONE™  
Manuscripts

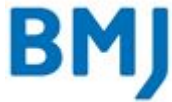

I, the Submitting Author has the right to grant and does grant on behalf of all authors of the Work (as defined in the below author licence), an exclusive licence and/or a non-exclusive licence for contributions from authors who are: i) UK Crown employees; ii) where BMJ has agreed a CC-BY licence shall apply, and/or iii) in accordance with the terms applicable for US Federal Government officers or employees acting as part of their official duties; on a worldwide, perpetual, irrevocable, royalty-free basis to BMJ Publishing Group Ltd ("BMJ") its licensees and where the relevant Journal is co-owned by BMJ to the co-owners of the Journal, to publish the Work in this journal and any other BMJ products and to exploit all rights, as set out in our [licence](#).

The Submitting Author accepts and understands that any supply made under these terms is made by BMJ to the Submitting Author unless you are acting as an employee on behalf of your employer or a postgraduate student of an affiliated institution which is paying any applicable article publishing charge ("APC") for Open Access articles. Where the Submitting Author wishes to make the Work available on an Open Access basis (and intends to pay the relevant APC), the terms of reuse of such Open Access shall be governed by a Creative Commons licence – details of these licences and which [Creative Commons](#) licence will apply to this Work are set out in our licence referred to above.

Other than as permitted in any relevant BMJ Author's Self Archiving Policies, I confirm this Work has not been accepted for publication elsewhere, is not being considered for publication elsewhere and does not duplicate material already published. I confirm all authors consent to publication of this Work and authorise the granting of this licence.

1  
2  
3 1 “I also take part in caring for the sick child” - A qualitative study on fathers’ roles  
4  
5  
6 2 and responsibilities in seeking care for children in Southwest Ethiopia  
7  
8  
9  
10 3  
11

12 4 Tjede Funk<sup>1\*</sup>, Karin Källander<sup>1,2,3</sup>, Ayalkibet Abebe<sup>4</sup>, Tobias Alfvén<sup>1,5#</sup>, Helle Mølsted  
13  
14 5 Alvesson<sup>1#</sup>  
15  
16  
17  
18 6  
19  
20

- 21 7 1 Department of Global Public Health, Karolinska Institute, Stockholm, Sweden  
22  
23 8 2 Malaria Consortium, London, United Kingdom  
24  
25 9 3 UNICEF, New York, USA  
26  
27 10 4 Malaria Consortium, Addis Ababa, Ethiopia  
28  
29 11 5 Sachs’ Children and Youth Hospital, Stockholm South General Hospital, Stockholm,  
30 12 Sweden  
31

32 13 # These authors have contributed equally to this work  
33

34 14 \* Corresponding author: Email: [tjede.funk@ki.se](mailto:tjede.funk@ki.se)  
35  
36  
37

38 15 Key words: Fathers, Child, Care-seeking, Ethiopia, Qualitative Research  
39  
40  
41  
42 16  
43  
44  
45  
46  
47  
48  
49  
50  
51  
52  
53  
54  
55  
56  
57  
58  
59  
60

1  
2  
3 18 **ABSTRACT**  
4  
5

6 19 **Objectives:** Fathers play an important role in household decision making processes and child  
7  
8 20 health development. Nevertheless, fathers are underrepresented in child health research,  
9  
10 21 especially in low-income settings. Not much is known about what roles fathers play in the care  
11  
12 22 seeking processes or how fathers interact with the health system when their children are sick.  
13  
14 23 This study therefore aimed to understand Ethiopian fathers' roles and responsibilities in caring  
15  
16 24 for their children when they fall ill.  
17

18  
19  
20  
21 25 **Design:** Qualitative study using semi-structured interviews with fathers.  
22

23  
24 26 **Setting:** This study was conducted in three districts of the Southern Nations, Nationalities and  
25  
26 27 People's Region, Ethiopia.  
27

28  
29 28 **Participants:** Twenty-four fathers of children under five years old who were enrolled in a  
30  
31 29 cluster randomised controlled trial.  
32

33  
34 30 **Results:** The overarching theme was "Changing perceptions of paternal responsibilities during  
35  
36 31 children's ill health". It constituted three sub-themes, namely "Fathers' burden of earning  
37  
38 32 money for care", "Fatherhood entails advocating children's health care needs" and "Investing  
39  
40 33 in children's health can benefit the family in the future". Fathers described that they were the  
41  
42 34 ones mainly responsible for the financial arrangement of care. This financial responsibility can  
43  
44 35 involve stress when resources are scarce. Fathers knew what health services were available and  
45  
46 36 accessible to them and they were in different ways involved in the care-seeking of the child.  
47  
48 37 Changes in the importance ascribed to child health were expressed by fathers who were more  
49  
50 38 alert to children's ill-health and directly involved in seeking childcare.  
51  
52

53  
54  
55  
56 39 **Conclusion:** Fathers play different roles in the care-seeking process during children's illness  
57  
58 40 episodes. This demonstrates the importance of including fathers in future interventions on  
59  
60

1  
2  
3 41 maternal and child health. The inability to organise necessary resources for care can lead to  
4  
5 42 involuntary delays in care-seeking for the child.  
6  
7  
8  
9 43

## 10 11 44 **STRENGTH AND LIMITATIONS OF THE STUDY**

- 15 45 • This study distinguishes itself from others by only focusing on fathers and their  
16  
17 46 perceived roles and responsibilities in the care seeking for sick children, which is an  
18  
19 47 underrepresented area in child health research.
- 22 48 • This study used a nested stratified sample and includes 24 fathers from highest and  
23  
24 49 lowest socio-economic quintiles and with few or many children.
- 26 50 • Interviews were conducted by male interviewers in two local languages using a semi-  
27  
28 51 structured interview format.
- 31 52 • We did not conduct interviews with mothers to confirm the responses of the fathers.

## 34 53 35 36 37 54 **INTRODUCTION**

40 55 Household decision making processes regarding child health care are complex. Although  
41  
42 56 mothers have historically been seen as responsible for their children and their health, multiple  
43  
44 57 studies from low-resource settings show that women have relatively low decision-making  
45  
46 58 power when it comes to health care decisions for themselves and their children [1-4]. A study  
47  
48 59 from The Gambia [5] states that mothers took decisions on when to take the child to the hospital  
49  
50 60 for cerebral malaria in only around 7% of the cases. Other studies confirm that it is mainly the  
51  
52 61 father who makes the final call on where and when to seek health care [5-7].

56  
57 62 The important role of fathers in child health and development are becoming better understood  
58  
59 63 and appreciated. Literature shows that involved fathers are associated with different positive

1  
2  
3 64 outcomes, such as knowledge of newborn danger signs among mothers, skilled birth attendance  
4  
5 65 and attendance of antenatal care visits [8-10]. Some countries have started to address this issue  
6  
7  
8 66 and mentioned the involvement of men in their road maps to reduce maternal and child  
9  
10 67 morbidity and mortality [11, 12]. Yet, in low-and middle-income countries only a minority of  
11  
12 68 fathers has been said to be engaged with their children [13].

13  
14  
15 69 Nevertheless, different forms of engagement and types of fathers exist. A study conducted in  
16  
17 70 Ethiopia categorised fathers into three different groups, depending on their perceptions,  
18  
19 71 practices, and challenges towards routine child care and feeding [14]. 1) Traditional fathers who  
20  
21 72 “do not feel part of routine child care, and they fully believe child care is only the mothers’  
22  
23 73 responsibility”; 2) Transitional fathers who “perceive child care as being both the mothers’ and  
24  
25 74 fathers’ responsibility”, but under different conditions (e.g. availability of the father or occupied  
26  
27 75 mother), meaning the father does not completely feel responsible for child care and 3) Modern  
28  
29 76 fathers who “perceive child care and child feeding as a shared responsibility between mother  
30  
31 77 and father” and who are totally involved in their child’s life. This indicates that not all fathers  
32  
33 78 are alike and that changes in the community and family roles might be happening.

34  
35  
36  
37  
38  
39 79 Even though different studies have shown that fathers often are the main decision-maker or the  
40  
41 80 breadwinner of the family and responsible to pay for healthcare costs [6, 7], not much is known  
42  
43 81 otherwise about what roles they take on in the care seeking process for their children or how  
44  
45 82 fathers interact with the health system when their children are sick. This study therefore aims  
46  
47 83 to understand fathers roles and responsibilities in care-seeking for children in rural areas of the  
48  
49 84 Southern Nations, Nationalities and People’s Region in Ethiopia.

50  
51  
52  
53 85

54  
55  
56 86

57  
58  
59 87  
60

## 88 MATERIALS AND METHODS

89 The reporting of the methods has been guided by the criteria for reporting qualitative research  
90 (COREQ) guidelines [15].

### 91 Setting

92 Interviews were conducted in three *woredas* (districts) of the Southern Nations, Nationalities  
93 and People's Region (SNNPR) of Ethiopia, namely Damot Gale, Boloso Sore and Halaba  
94 Special Woreda. Together these *woredas* are estimated to have a population of around 750,000,  
95 of which the vast majority (~80%) lives in rural areas. At the time of this study, there were 150  
96 health posts in the study area with a total of 284 health extension workers (HEWs) working in  
97 them. HEWs are women with at least a grade 10 education. Usually two HEWs work in pairs  
98 at one health post and serve an estimate of 3,000 - 5,000 people. However, travel distances to  
99 these health posts can vary from a few minutes to an hour or more walking distance [16].

100 According to the Demographic and Health Survey report 2016 [17] the child mortality rate in  
101 the SNNPR is 88 per 1,000 live births, which was above the national average (69/1,000). A  
102 minority of married women (40%) used modern contraceptives (incl. sterilisation, contraceptive  
103 pills, condoms and implants), and even fewer, less than 30%, give birth in a health facility.

104 It is estimated that 31% of the Ethiopian population live below the international poverty line of  
105 \$1.90 per day [18]. To get help and (financial) support, *Idir*, a financial organisation  
106 arrangement, has been established among many rural neighbourhoods. Members of *idir* are  
107 contributing a small amount of money on a regular basis and are in return able to borrow some  
108 money in case of need [19]. This provides these rural and poor populations with a limited form  
109 of self-arranged insurance system.

110



### 111 **Study design and data collection**

112 This qualitative study was nested within a community-based cluster randomised controlled non-  
113 inferiority trial (cRCT). The design and results of this trial are published elsewhere, as is the  
114 qualitative evaluation of HEW's and caregivers' perception of the recommendations [20-22].

115 For this study, twenty-four semi-structured interviews were conducted with fathers of children  
116 recruited for the cRCT. Two of the interviews were not completed due to time constraints of the  
117 father. Half of the interviews (n=12) were conducted in Halaba *woreda*, eight in Boloso Sore  
118 and four in Damot Gale. Boloso Sore and Damot Gale are culturally and linguistically similar  
119 which is why they together represent half of the fathers interviewed.

120 The sampling method was based on the assumptions that health seeking practices and fathers'  
121 decision-making power could differ by socio-economic position and number of children. We  
122 therefore used stratified sampling to select half of the fathers from the lowest and the other half  
123 from the highest socio-economic quintile. Socio-economic quintiles based on caregivers'  
124 responses to questions about household assets (e.g. material of the house, toilet facility used,  
125 availability of TV/radio or electricity in general). It should be kept in mind that a high socio-  
126 economic quintile in this study is not equivalent to a high socio-economic status. Within the  
127 two strata, fathers with few children (1-2) and fathers with multiple children (3 or more) were  
128 invited for an interview to maximise the level of heterogeneity among the fathers. However,  
129 the information on number of children reported in the cRCT did not always tally with the  
130 number of children mentioned by the father during the interview, which is why most fathers  
131 (n=19/24) in this study had three or more children.

132 An interview guide was developed covering themes such as utilisation of health services, fever  
133 in children, decision making around health services and drivers and conditions that influence

1  
2  
3 134 health care seeking. The interview guide was informed by literature on health care seeking and  
4  
5 135 gender roles. It was prepared in English and subsequently translated into Amharic.  
6  
7

8 136 Three male interviewers conducted the interviews, two in Boloso Sore and Damot Gale and one  
9  
10 137 in Halaba. The interviewers were selected based on their experience in qualitative research,  
11  
12 138 English proficiency, and educational background in health sciences. In Halaba, a male  
13  
14 139 interpreter was additionally recruited for translations from Amharic to Halabigna (local  
15  
16 140 language of Halaba). In Boloso Sore and Damot Gale interviews were conducted in Wolaitegna  
17  
18 141 by two interviewers who were from the district and thus familiar with the area and language.  
19  
20 142 No interviewer met the fathers before the conduction of the interviews.  
21  
22  
23  
24

25 143 All interviewers and the interpreter received a half-day training from authors TF and AA. After  
26  
27 144 the training, every interviewer conducted one pilot interview. Changes to the interview guide  
28  
29 145 were made accordingly and interviewers received feedback on how to improve their  
30  
31 146 interviewing.  
32  
33  
34

35 147 The interviews were conducted in March 2017 and took between 34 and 70 minutes, with  
36  
37 148 interviews using an interpreter taking longer. All interviews were conducted in a quiet place  
38  
39 149 outside; the majority taking place close to the father's home. Fathers were aged between 20 and  
40  
41 150 50 years and the number of children ranged between one and fourteen (see Table 1). In Halaba,  
42  
43 151 multiple fathers had two wives. The majority of fathers were farmers.  
44  
45  
46  
47

48 152 All 24 interviews were digitally recorded, transcribed and translated into English. After their  
49  
50 153 participation in the interview, fathers received 122.5 Birr in cash (~5.5 USD) to compensate for  
51  
52 154 their time. This amount equals the common local Malaria Consortium lunch allowance.  
53  
54

55 155

56 156

57 157  
58  
59  
60

1  
2  
3 **158 Table 1 Characteristics of study participants**  
4

5 159  
6  
7

8 160  
9

10 **161 Patient and public involvement**  
11

12 162 There was no involvement of patients/interviewees or the public in setting the research agenda  
13  
14  
15 163 or formulating interview guides.  
16  
17

18 164  
19  
20

21 **165 Data analysis**  
22

23  
24 166 The transcripts were read multiple times and codes to the material applied using the qualitative  
25  
26 167 data structuring software Nvivo version 11. Interviews were analysed using content analysis  
27  
28 168 [23]. The analysis was an iterative process involving reading of literature and repeated reading  
29  
30 169 of interview transcripts. The coding process was done in steps. TF conducted the initial coding  
31  
32 170 and discussions took place with HMA. After each meeting, changes to the codes were made.  
33  
34 171 Finally, codes were grouped, and themes identified, which were again discussed between  
35  
36 172 authors TF and HMA. All father interviews were analysed together, meaning that no  
37  
38 173 stratification by socio-economic quintiles and number of children of fathers (strata used for the  
39  
40 174 sample selection) took place for the analysis. However, after the coding of the data was done,  
41  
42 175 it was checked whether fathers from different strata were represented in each theme.  
43  
44  
45  
46  
47

48 **176 Ethical approval**  
49

50  
51 177 This study is part of a cRCT which was approved by the SNNPR Health Bureau Research  
52  
53 178 Ethical Review Committee (P02-6-19/4511). The trial is registered as NCT02926625. Written  
54  
55 179 and oral consent was obtained from all study participants. Confidentiality was ensured and the  
56  
57  
58  
59  
60

1  
2  
3 180 aim of the study was explained to the fathers prior to the interview and they were informed  
4  
5 181 about the possibility to decline participation or drop out of the interview.  
6  
7  
8  
9 182  
10  
11  
12 183  
13  
14

## 15 184 **RESULTS**

16  
17  
18 185 Three sub-themes emerged from the data: 1) Fathers' burden of earning money for care, 2)  
19  
20 186 Fatherhood entails advocating children's health care needs, and 3) Investing in children's health  
21  
22 187 can benefit the family in the future. The results are presented according to these themes and fed  
23  
24 188 into the overarching theme of "Changing perceptions of paternal responsibilities during  
25  
26 189 children's ill health".  
27  
28  
29

30 190

### 31 32 33 191 **Fathers' burden of earning money for care**

34  
35  
36 192 Fathers described their roles and responsibilities in care-seeking for children mostly in terms of  
37  
38 193 financial responsibilities. They explained that their main role as father is to work and earn  
39  
40 194 money to be able to finance health care costs and, when necessary, transportation to the facility.  
41  
42 195 Fathers felt strongly that "*money matters*" when it comes to seeking care for children.  
43  
44 196 Nevertheless, it was explained that they often did not have the necessary resources at hand to  
45  
46 197 finance health care costs. This was the case for fathers from both socio-economic strata (lowest  
47  
48 198 and highest socio-economic quintile). Most fathers interviewed mentioned that health care costs  
49  
50 199 are financed through work or selling goods, animals or land. In cases where insufficient money  
51  
52 200 could be arranged, fathers would make other arrangements, such as borrowing money to pay  
53  
54 201 for health care costs. Fathers would either borrow money through *idir* or from family and  
55  
56 202 friends. Mothers were often described to not have an own income source that could contribute  
57  
58  
59  
60

1  
2  
3 203 to health care expenses. Furthermore, mothers generally were described to have difficulties in  
4  
5 204 borrowing money and even though they would try, they would often not receive a loan [from  
6  
7 205 *idir*]. Consequently, the burden on arranging resources for treatment was, according to the  
8  
9  
10 206 fathers, mainly placed on them.

11  
12  
13 207 The financial stress that fathers go through was described by this father:

14  
15  
16 208 *We have idir where we save some amount of money regularly. I have to pay back the money*  
17  
18 209 *within 10 to 15 days. In case they don't allow me [to borrow money] due to some*  
19  
20 210 *inconveniences, I borrow from friends, relatives, particularly from my grandmother. But the*  
21  
22 211 *reality is that I borrow again before I paid back the first loan. (ID 8; lowest socio-economic*  
23  
24 212 *quintile; 3+ children)*

25  
26  
27  
28 213 A father also emphasised that it was easier to borrow money for fathers with a better financial  
29  
30 214 situation compared to fathers with few resources. This further emphasised the financial worries  
31  
32 215 that fathers are faced with.

33  
34  
35  
36 216 *The father with better financial resources can take his children to health providers easily. Even*  
37  
38 217 *if he doesn't have the money, he can borrow it easily because people believe that he can pay it*  
39  
40 218 *back. But if the poor wants to borrow money from friends or other people, people are not happy*  
41  
42 219 *to give him [money] because they are wondering 'from where is he going to pay me back?' (ID*  
43  
44 220 *4; lowest socio-economic quintile; 3+ children)*

45  
46  
47  
48 221 In addition, fathers also mentioned that care-seeking of their child can be delayed if they have  
49  
50 222 no money at hand and sometimes it could take several days to find the necessary resources to  
51  
52 223 finance health care costs. Consequently, it was expressed that even if a father wanted to seek  
53  
54 224 care immediately, this was not always possible. Fathers from both socio-economic strata  
55  
56 225 mentioned such financial worries and constraints.

1  
2  
3 226 [...] if we go to [name of] hospital, we may pay up to 1000 birr (~36 USD). Even if we only  
4  
5 227 stay one night there, they charge us 700 up to 800 birr (~25-30 USD). The more we stay there,  
6  
7 228 the more money we are expected to pay. If we don't have money, we are left with staying home  
8  
9 229 with the sick child and praying to God. (ID 15; lowest socio-economic quintile; 3+ children)  
10  
11  
12

13 230  
14  
15

### 16 231 **Fatherhood entails advocating children's health care needs**

17  
18  
19 232 Fathers were well aware of the different health services available to their children, whether it  
20  
21 233 was the health post, health centre, private or traditional providers.  
22  
23

24  
25 234 Fathers stated that they discussed with their wives on what actions to take and where to take the  
26  
27 235 child when it is sick. However, many of them still saw themselves as the ultimate decision  
28  
29 236 maker whose suggestion will be followed.  
30  
31

32  
33 237 *Since I bear more responsibility as father on my family's affairs, it is my decision that needs to*  
34  
35 238 *be adhered to. Since she [wife] doesn't have an income generating work and we solely depend*  
36  
37 239 *on the income I get, it is me who decides over issues. (ID 15; lowest socio-economic quintile;*  
38  
39 240 *3+ children)*  
40  
41

42  
43 241 Different factors can influence the choice to which provider a child is taken. The type of illness  
44  
45 242 the child has can be such a factor. When the child is suspected to have bone fractures or a  
46  
47 243 dislocation, multiple fathers explained that traditional healers (also referred to as "bone setter")  
48  
49 244 are the first choice of treatment. If the traditional treatment is not effective, other sources of  
50  
51 245 treatment will be sought. For other types of illnesses, a father would directly take the child to  
52  
53 246 another health provider, such as the health post.  
54  
55  
56  
57  
58  
59  
60

1  
2  
3 247 Money was also explained to be a decisive factor in the care-seeking process. According to  
4  
5 248 fathers, the availability of money and resources provides a freedom of choosing a health  
6  
7 249 provider for the child's health condition. This freedom is constrained if resources are scarce.

9  
10 250 *Rich [people] take sick children directly to hospital. But since poor [people] have no money,*  
11  
12 251 *they take [the child] to the health post. They only take [the child] to the hospital when its*  
13  
14 252 *condition is life threatening. (ID 8)*

15  
16  
17  
18 253 Multiple fathers seemed to prefer the health centre over the health post, because more and better  
19  
20 254 treatment is believed to be available there. It was stressed that the general perception is that  
21  
22 255 treatment is better in urban areas and also faster at private providers, though private providers  
23  
24 256 being expensive and described as business-oriented. Nevertheless, if the money is available,  
25  
26 257 some fathers still preferred their services over public facilities. Fathers observed a formal care  
27  
28 258 chain (or "hierarchy") in health care. They described that health centres expect them to go to  
29  
30 259 have a referral slip from the health post, making it harder for them to directly access treatment  
31  
32 260 at the health centre, which was seen as an obstacle.

33  
34  
35  
36  
37  
38 261 Bringing the child to a health post for treatment was, according to the fathers interviewed, often  
39  
40 262 first a responsibility of the mother. However, in different circumstances this responsibility was  
41  
42 263 less clear. Mothers were described to be responsible for bringing the children who are breastfed  
43  
44 264 to the health provider, whereas fathers claimed to mainly accompany older children that can  
45  
46 265 walk or sit on a motorcycle to the health provider. Whether or not a father brings or accompanies  
47  
48 266 a child to a health facility also depended on the health facility in question. One father explained  
49  
50 267 that the mother can seek care at the health post alone, but fathers need to be consulted to seek  
51  
52 268 care at the health centre or higher-level facilities which often implies more severe illnesses.

53  
54  
55  
56  
57 269 *When the mother notices that the child is sick, she takes her [the child] to health post. If the*  
58  
59 270 *health post advises her [the mother] to take the child to the health centre [i.e. refers the child*

1  
2  
3 271 *as the health problem is not identified or manageable at community level], she returns back*  
4  
5 272 *and waits for my return. After I return back to home, we together take the child to the health*  
6  
7 273 *centre together. (ID 15; lowest socio-economic quintile; 3+ children)*  
8  
9

10 274 If the child needed to stay at the hospital, also a father described to stay with it. In addition, the  
11  
12 275 arrangement of the transportation to the health facility was, according to some fathers, also the  
13  
14 276 role of them.  
15  
16  
17

### 18 277 **Investing in children's health can benefit family in the future**

19  
20  
21 278 Behaviours of fathers in regard to seeking care for children has been changing over time. It was  
22  
23 279 explained that fathers today are more involved in child health matters compared to the past and  
24  
25 280 that they do not leave this issue entirely up to the mothers anymore. Fathers stated to be more  
26  
27 281 alert about changes in health status of their children and that they will not rely only on faith to  
28  
29 282 cure the child.  
30  
31  
32

33  
34 283 *I can say that the love I have to my children is stronger than the mother's love. Due to that*  
35  
36 284 *reason, I also closely follow their [the children's] health situation. (ID 4; lowest socio-*  
37  
38 285 *economic quintile; 3+ children)*  
39  
40

41 286 A couple of fathers pointed out the value that children have and can bring in the future, for  
42  
43 287 instance through working and supporting the family financially. Consequently, fathers pay  
44  
45 288 more attention to their child's health status and make sure that they recover.  
46  
47  
48

49 289 *In past time, there were widely held assumptions among fathers that a child will grow by his*  
50  
51 290 *fate so that no worries are needed. But this belief is changing as those sons and daughters that*  
52  
53 291 *work at urban centres and abroad send [money] and augment their family's income. Children*  
54  
55 292 *now are believed to be assets and obtain great care. So fathers are alert whenever they observe*  
56  
57 293 *changes in their children's health. (ID 18; highest socio-economic quintile; 3+ children)*  
58  
59  
60



1  
2  
3 294 Fathers also observed changes in the health services over time. They noticed that health posts  
4  
5 295 that are now existing in their community have not been available in the past.  
6  
7  
8  
9 296  
10  
11 297  
12  
13  
14 298  
15  
16  
17 299

## 20 300 **DISCUSSION**

23 301 This study indicated that fathers are involved in the care-seeking for their sick child in different  
24  
25 302 ways. They explained that they bear the main responsibility to arrange financial resources to  
26  
27 303 enable a health care visit and that this responsibility can imply stress and financial concerns  
28  
29 304 when resources are scarce. Fathers were well aware of the health services available to their  
30  
31 305 children and they described to be involved in the care-seeking process in different ways, e.g.  
32  
33 306 (co-)deciding where to take the child or accompanying their child to the health facility. Fathers  
34  
35 307 explained that changes in fathers' perception on children and their involvement have taken  
36  
37 308 place. They described themselves to be more aware of the health status of their children and  
38  
39 309 more involved in child health matter as compared to the past.  
40  
41  
42  
43

44 310 This transitional change in fathers' perceptions on their children has been described in another  
45  
46 311 study conducted in Ethiopia [24]. Multiple fathers interviewed in this study would fit into the  
47  
48 312 "transitional fathers" category. According to them, child health issues are not seen as only a  
49  
50 313 task of the mother anymore. On the other hand, some fathers also mentioned more traditional  
51  
52 314 features. This could suggest that change is happening in these rural areas and that with  
53  
54 315 continuous efforts fathers' roles as caregiver could be strengthened. Additionally, the phrasing  
55  
56 316 of the last theme "Investing in children's health can benefit family in the future" seems very  
57  
58  
59  
60

1  
2  
3 317 timely, considering that a recently published report by the WHO-UNICEF-Lancet Commission  
4  
5 318 highlights the importance and benefits of investing in children [25]. It is interesting that the  
6  
7 319 recognition of this relevance has to a certain extent, and due to different reasons, also reached  
8  
9 320 the families. It is noteworthy that fathers did not only observe changes in their behaviour but  
10  
11 321 they also appreciated changes in the availability of health services, through e.g. the  
12  
13 322 establishment of a health post in their community.  
14  
15  
16

17  
18 323 Multiple studies have shown that fathers are often responsible for the household finances and  
19  
20 324 financing of care [6, 7, 26-28]. This study coincided with these findings, but also shed light  
21  
22 325 upon the burden that this responsibility brings along when a child falls ill. The reality described  
23  
24 326 by fathers was that often resources were not available to finance health care costs and that in  
25  
26 327 many cases fathers needed to borrow money again before having paid back their first debt. It  
27  
28 328 appears to be a vicious circle in which particularly very poor fathers are placed and  
29  
30 329 demonstrates the difficult situations that these families go through in times of sickness. The  
31  
32 330 inability to arrange money to pay for health care costs can lead to involuntary delays in care-  
33  
34 331 seeking. The link between costs and delayed health care has been previously described in the  
35  
36 332 literature [29, 30]. These findings suggest that besides educating parents on danger signs and  
37  
38 333 when to seek care, it is very important to get the health care infrastructure in place and to make  
39  
40 334 health facilities accessible to the communities. The Sustainable Development Goal 3.8 touches  
41  
42 335 upon this as it aims to “achieve universal health coverage, including financial risk protection  
43  
44 336 [and] access to quality essential health-care services (...)” [31]. In order to further improve  
45  
46 337 maternal and child health, health services should be made accessible to all, both physically and  
47  
48 338 economically [32].  
49  
50  
51  
52  
53

54  
55 339 In this study, many fathers told that they discuss and decide together with their wives on what  
56  
57 340 to do when their child is sick. Nevertheless, multiple of these fathers still saw themselves as  
58  
59 341 final decision-makers whose opinions should be adhered to. Literature supports that fathers  
60

1  
2  
3 342 often are the decision-maker of the household [5, 7], which raises questions on the true  
4  
5 343 influence of mothers' opinions on the decision-making processes. It is known that fathers play  
6  
7 344 an important role in a children's development. Positive involvement of fathers can impact not  
8  
9  
10 345 only children's cognitive skills, but also their social competences and behavioural or emotional  
11  
12 346 outcomes [33-35]. This shows, together with fathers' important role as decision-maker and  
13  
14 347 breadwinner in the care-seeking process, that there is a strong need for including fathers in  
15  
16 348 future interventions aimed at improving maternal and child health. It is thereby crucial to  
17  
18 349 consider that many fathers spend much time of the day away from home because of their work.  
19  
20  
21 350 Interventions need to be formulated accordingly.  
22  
23

24 351 Another interesting finding of this study was that fathers were not only involved in household  
25  
26 352 decision-making and finances, but that they also were directly in contact with the health system  
27  
28 353 for their children. Fathers in this study were not only well aware of the different health providers  
29  
30 354 available or accessible to them, but also described to have direct contact with the health system,  
31  
32 355 by sometimes bringing the child to the health facility or accompanying the mother. We did not  
33  
34 356 come across a study that discussed similar findings.  
35  
36  
37  
38

39 357

## 40 41 42 358 **STRENGTHS AND WEAKNESSES**

43  
44 359 This study focussed on fathers only. This is adding to current literature as fathers are still  
45  
46 360 underrepresented in child health research. We conducted interviews in the local language in  
47  
48 361 Boloso Sore and Damot Gale. As this was not possible in Halaba, we tried to overcome  
49  
50 362 language diversity through a local interpreter. Two interviews in Halaba were not finalised due  
51  
52 363 to other obligations of the father. As these selected fathers have not been replaced, some  
53  
54 364 information was lost. However, due to the large number of interviews conducted we still  
55  
56 365 consider having obtained enough information.  
57  
58  
59  
60

1  
2  
3 366 A social desirability bias (e.g. father claiming to be more involved in the care-seeking process  
4  
5 367 than they actually are) cannot be excluded with certainty in this study. We did not conduct  
6  
7 368 interviews with mothers to check or confirm the accuracy of fathers' responses. Nevertheless,  
8  
9 369 we aimed to mitigate the chances of a desirability bias by using male interviewers. We therefore  
10  
11 370 believe that the information provided does reflect their roles and perceptions well. Multiple  
12  
13 371 findings of this study coincided with previous literature. We thus assume that these findings are  
14  
15 372 transferable to communities with similar family structures and cultural contexts and health  
16  
17 373 systems.  
18  
19  
20  
21  
22 374

## 23 24 25 375 **CONCLUSIONS**

26  
27 376 Fathers' play an important role in the care-seeking process of their children. Not only do they  
28  
29 377 have decision-making power and the financial responsibility, but they are also otherwise  
30  
31 378 involved in the care-seeking process, such as arranging transportation or accompanying the  
32  
33 379 child at times to the facility. Fathers are familiar with the health services available to their  
34  
35 380 children and even noticed positive changes in the paternal involvement in childcare as well as  
36  
37 381 availability of health services through the establishment of health posts in their communities.  
38  
39 382 Besides the important roles that fathers play in the care-seeking process, they are still today  
40  
41 383 underrepresented in child health research and interventions. Efforts need to be made to continue  
42  
43 384 the observed positive trend in fathers' involvement in care seeking described in this study.  
44  
45 385 Future research on maternal and child health needs to step up on highlighting the role of fathers.  
46  
47 386 The inability to organise necessary resources for care can lead to involuntary delays in care-  
48  
49 387 seeking for the child. It is therefore crucial to continue strengthening health care systems and  
50  
51 388 making health services more accessible to communities, both physically and financially.  
52  
53  
54  
55  
56  
57  
58  
59  
60

## 390 **ACKNOWLEDGEMENTS**

391 We thank the Federal Ministry of Health in Ethiopia, the Regional Health Bureau in  
392 SNNPR (in particular, our technical advisor, Dr. Habtamu Beyene), and the woreda offices in  
393 Damot Gale, Boloso Sore and Halaba. We extend our thanks to all fathers we interviewed for  
394 granting us their time and being willing to share their experiences. Finally, we would like to  
395 acknowledge Tesfahun Tadesse, Muluken Tamirat, Tessema Awano for conducting the  
396 interviews and Ahmedin Alemu for functioning as interpreter.

## 398 **FUNDING STATEMENT**

399 This work was part of the Translating Research into Action (TRAction) and funded by the  
400 President's Malaria Initiative and United States Agency for International Development  
401 (USAID) under cooperative agreement No.GHS-A-00-09-00015-00.

## 403 **COMPETING INTEREST**

404 The authors' declare that they have no competing interest.

## 406 **AUTHORS' CONTRIBUTION**

407 All authors were involved in conceiving and designing the study. TF, KK, TA and HMA  
408 developed the study plan and formulated the interview guide. TF and AA were training the  
409 interviewers and following the interview process. TF and HMA analysed the interviews. TF  
410 wrote the paper together with all other authors. All authors read and approved the final version  
411 of this paper.

412

## 413 REFERENCES

- 414 1. Fantahun, M., et al., *Women's involvement in household decision-making and*  
415 *strengthening social capital—crucial factors for child survival in Ethiopia*. *Acta*  
416 *paediatrica*, 2007. **96**(4): p. 582-589.
- 417 2. Senarath, U. and N.S. Gunawardena, *Women's autonomy in decision making for health*  
418 *care in South Asia*. *Asia Pacific Journal of Public Health*, 2009. **21**(2): p. 137-143.
- 419 3. Alemayehu, M. and M. Meskele, *Health care decision making autonomy of women*  
420 *from rural districts of Southern Ethiopia: a community based cross-sectional study*.  
421 *International journal of women's health*, 2017. **9**: p. 213.
- 422 4. Osamor, P.E. and C. Grady, *Women's autonomy in health care decision-making in*  
423 *developing countries: a synthesis of the literature*. *International journal of women's*  
424 *health*, 2016. **8**: p. 191.
- 425 5. Okoko, B.J. and L.K. Yamuah, *Household decision-making process and childhood*  
426 *cerebral malaria in The Gambia*. *Archives of medical research*, 2006. **37**(3): p. 399-  
427 402.
- 428 6. Abubakar, A., et al., *Socio-cultural determinants of health-seeking behaviour on the*  
429 *Kenyan coast: a qualitative study*. *PloS one*, 2013. **8**(11): p. e71998.
- 430 7. Ellis, A.A., et al., *Household roles and care-seeking behaviours in response to severe*  
431 *childhood illness in Mali*. *Journal of Biosocial Science*, 2013. **45**(6): p. 743-759.
- 432 8. Zaman, S.B., et al., *Husband's involvement with mother's awareness and knowledge*  
433 *of newborn danger signs in facility-based childbirth settings: a cross-sectional study*  
434 *from rural Bangladesh*. *BMC research notes*, 2018. **11**(1): p. 286.
- 435 9. Mangeni, J.N., et al., *Male involvement in maternal healthcare as a determinant of*  
436 *utilisation of skilled birth attendants in Kenya*. *East African medical journal*, 2012.  
437 **89**(11): p. 372-383.
- 438 10. Yargawa, J. and J. Leonardi-Bee, *Male involvement and maternal health outcomes:*  
439 *systematic review and meta-analysis*. *J Epidemiol Community Health*, 2015: p. jech-  
440 2014-204784.
- 441 11. Malawi Ministry of Health, *Road Map for Accelerating the reduction of Maternal and*  
442 *Neonatal Morbidity and Mortality in Malawi*. 2012.
- 443 12. Tanzania Ministry of Health, et al., *The National Road Map Strategic Plan to improve*  
444 *reproductive, maternal, newborn, child & adolescent health in Tanzania (2016-2020)*.  
445 2016: Dar es Salaam.
- 446 13. Jeong, J., et al., *Paternal stimulation and early child development in low-and middle-*  
447 *income countries*. *Pediatrics*, 2016. **138**(4): p. e20161357.
- 448 14. Bilal, S., et al., *Fathers' Perception, Practice, and Challenges in Young Child Care*  
449 *and Feeding in Ethiopia*. *Food and nutrition bulletin*, 2016. **37**(3): p. 329-339.
- 450 15. Tong, A., P. Sainsbury, and J. Craig, *Consolidated criteria for reporting qualitative*  
451 *research (COREQ): a 32-item checklist for interviews and focus groups*. *International*  
452 *journal for quality in health care*, 2007. **19**(6): p. 349-357.
- 453 16. Okwaraji, Y.B., et al., *The association between travel time to health facilities and*  
454 *childhood vaccine coverage in rural Ethiopia. A community based cross sectional*  
455 *study*. *BMC public health*, 2012. **12**(1): p. 476.
- 456 17. Central Statistical Agency (CSA) [Ethiopia], ICF, and *Ethiopia Demographic and*  
457 *Health Survey 2016*. 2016, CSA and ICF.: Addis Ababa, Ethiopia, and Rockville,  
458 Maryland, USA.



- 1  
2  
3 459 18. World Bank. *Ethiopia*. 2018 [cited 2020 08 January]; Available from:  
4 460 <https://data.worldbank.org/country/ethiopia>.
- 5 461 19. Teshome, E., et al., *Participation and significance of self-help groups for social*  
6 462 *development: exploring the community capacity in Ethiopia*. SpringerPlus, 2014. **3**(1):  
7 463 p. 189.
- 8 464 20. Källander, K., et al., *Universal versus conditional day 3 follow-up for children with*  
9 465 *non-severe unclassified fever at the community level in Ethiopia: A cluster-*  
10 466 *randomised non-inferiority trial*. PLoS medicine, 2018. **15**(4): p. e1002553-e1002553.
- 11 467 21. Källander, K., et al., *Universal versus conditional third day follow-up visit for*  
12 468 *children with nonsevere unclassified fever at the community level in Ethiopia:*  
13 469 *Protocol for a cluster randomized noninferiority trial*. JMIR research protocols, 2018.  
14 470 **7**(4): p. e99-e99.
- 15 471 22. Funk, T., et al., *Management and follow-up practices of children with unclassified*  
16 472 *fever in rural Ethiopia: experiences of health extension workers and caregivers*. The  
17 473 *American journal of tropical medicine and hygiene*, 2018. **99**(5): p. 1255-1261.
- 18 474 23. Elo, S. and H. Kyngäs, *The qualitative content analysis process*. Journal of Advanced  
19 475 Nursing, 2008. **62**(1): p. 107-115.
- 20 476 24. Bilal, S., *The fathers' role in child nutrition in Ethiopia*. 2015: Maastricht University.
- 21 477 25. Clark, H., et al., *A future for the world's children? A WHO–UNICEF–Lancet*  
22 478 *Commission*. The Lancet, 2020. **395**(10224): p. 605-658.
- 23 479 26. Ewing, V.L., et al., *Increasing understanding of the relationship between geographic*  
24 480 *access and gendered decision-making power for treatment-seeking for febrile children*  
25 481 *in the Chikwawa district of Malawi*. Malaria journal, 2016. **15**(1): p. 521.
- 26 482 27. Montgomery, C.M., et al., *'To help them is to educate them': power and pedagogy in*  
27 483 *the prevention and treatment of malaria in Tanzania*. Tropical Medicine &  
28 484 International Health, 2006. **11**(11): p. 1661-1669.
- 29 485 28. Tolhurst, R. and F.K. Nyonator, *Looking within the household: gender roles and*  
30 486 *responses to malaria in Ghana*. Transactions of the Royal Society of Tropical  
31 487 Medicine and Hygiene, 2006. **100**(4): p. 321-326.
- 32 488 29. Getahun, A., K. Deribe, and A. Deribew, *Determinants of delay in malaria treatment-*  
33 489 *seeking behaviour for under-five children in south-west Ethiopia: a case control study*.  
34 490 Malaria Journal, 2010. **9**(1): p. 320.
- 35 491 30. Hildenwall, H., et al., *"I never had the money for blood testing"—Caretakers'*  
36 492 *experiences of care-seeking for fatal childhood fevers in rural Uganda—a mixed*  
37 493 *methods study*. BMC international health and human rights, 2008. **8**(1): p. 12.
- 38 494 31. United Nations. *Sustainable Development Goals*. [cited 2019 14 January ]; Available  
39 495 from: <https://sustainabledevelopment.un.org/>.
- 40 496 32. Tanou, M. and Y. Kamiya, *Assessing the impact of geographical access to health*  
41 497 *facilities on maternal healthcare utilization: evidence from the Burkina Faso*  
42 498 *demographic and health survey 2010*. BMC Public Health, 2019. **19**(1): p. 838.
- 43 499 33. Rollè, L., et al., *Father Involvement and Cognitive Development in Early and Middle*  
44 500 *Childhood: A Systematic Review*. Frontiers in psychology, 2019. **10**: p. 2405.
- 45 501 34. Torres, N., et al., *Domains of father involvement, social competence and problem*  
46 502 *behavior in preschool children*. Journal of Family Studies, 2014. **20**(3): p. 188-203.
- 47 503 35. Kroll, M.E., et al., *Early father involvement and subsequent child behaviour at ages 3,*  
48 504 *5 and 7 years: Prospective analysis of the UK millennium cohort study*. PloS one,  
49 505 2016. **11**(9): p. e0162339.
- 50  
51  
52  
53  
54  
55  
56  
57  
58 506  
59  
60

## COREQ (CONsolidated criteria for REporting Qualitative research) Checklist

A checklist of items that should be included in reports of qualitative research. You must report the page number in your manuscript where you consider each of the items listed in this checklist. If you have not included this information, either revise your manuscript accordingly before submitting or note N/A.

| Topic                                          | Item No. | Guide Questions/Description                                                                                                                              | Reported on Page No. |
|------------------------------------------------|----------|----------------------------------------------------------------------------------------------------------------------------------------------------------|----------------------|
| <b>Domain 1: Research team and reflexivity</b> |          |                                                                                                                                                          |                      |
| <i>Personal characteristics</i>                |          |                                                                                                                                                          |                      |
| Interviewer/facilitator                        | 1        | Which author/s conducted the interview or focus group?                                                                                                   |                      |
| Credentials                                    | 2        | What were the researcher's credentials? E.g. PhD, MD                                                                                                     |                      |
| Occupation                                     | 3        | What was their occupation at the time of the study?                                                                                                      |                      |
| Gender                                         | 4        | Was the researcher male or female?                                                                                                                       |                      |
| Experience and training                        | 5        | What experience or training did the researcher have?                                                                                                     |                      |
| <i>Relationship with participants</i>          |          |                                                                                                                                                          |                      |
| Relationship established                       | 6        | Was a relationship established prior to study commencement?                                                                                              |                      |
| Participant knowledge of the interviewer       | 7        | What did the participants know about the researcher? e.g. personal goals, reasons for doing the research                                                 |                      |
| Interviewer characteristics                    | 8        | What characteristics were reported about the interviewer/facilitator? e.g. Bias, assumptions, reasons and interests in the research topic                |                      |
| <b>Domain 2: Study design</b>                  |          |                                                                                                                                                          |                      |
| <i>Theoretical framework</i>                   |          |                                                                                                                                                          |                      |
| Methodological orientation and Theory          | 9        | What methodological orientation was stated to underpin the study? e.g. grounded theory, discourse analysis, ethnography, phenomenology, content analysis |                      |
| <i>Participant selection</i>                   |          |                                                                                                                                                          |                      |
| Sampling                                       | 10       | How were participants selected? e.g. purposive, convenience, consecutive, snowball                                                                       |                      |
| Method of approach                             | 11       | How were participants approached? e.g. face-to-face, telephone, mail, email                                                                              |                      |
| Sample size                                    | 12       | How many participants were in the study?                                                                                                                 |                      |
| Non-participation                              | 13       | How many people refused to participate or dropped out? Reasons?                                                                                          |                      |
| <i>Setting</i>                                 |          |                                                                                                                                                          |                      |
| Setting of data collection                     | 14       | Where was the data collected? e.g. home, clinic, workplace                                                                                               |                      |
| Presence of non-participants                   | 15       | Was anyone else present besides the participants and researchers?                                                                                        |                      |
| Description of sample                          | 16       | What are the important characteristics of the sample? e.g. demographic data, date                                                                        |                      |
| <i>Data collection</i>                         |          |                                                                                                                                                          |                      |
| Interview guide                                | 17       | Were questions, prompts, guides provided by the authors? Was it pilot tested?                                                                            |                      |
| Repeat interviews                              | 18       | Were repeat interviews carried out? If yes, how many?                                                                                                    |                      |
| Audio/visual recording                         | 19       | Did the research use audio or visual recording to collect the data?                                                                                      |                      |
| Field notes                                    | 20       | Were field notes made during and/or after the interview or focus group?                                                                                  |                      |
| Duration                                       | 21       | What was the duration of the interviews or focus group?                                                                                                  |                      |
| Data saturation                                | 22       | Was data saturation discussed?                                                                                                                           |                      |
| Transcripts returned                           | 23       | Were transcripts returned to participants for comment and/or                                                                                             |                      |



| Topic                                  | Item No. | Guide Questions/Description                                                                                                        | Reported on Page No. |
|----------------------------------------|----------|------------------------------------------------------------------------------------------------------------------------------------|----------------------|
|                                        |          | correction?                                                                                                                        |                      |
| <b>Domain 3: analysis and findings</b> |          |                                                                                                                                    |                      |
| <i>Data analysis</i>                   |          |                                                                                                                                    |                      |
| Number of data coders                  | 24       | How many data coders coded the data?                                                                                               |                      |
| Description of the coding tree         | 25       | Did authors provide a description of the coding tree?                                                                              |                      |
| Derivation of themes                   | 26       | Were themes identified in advance or derived from the data?                                                                        |                      |
| Software                               | 27       | What software, if applicable, was used to manage the data?                                                                         |                      |
| Participant checking                   | 28       | Did participants provide feedback on the findings?                                                                                 |                      |
| <i>Reporting</i>                       |          |                                                                                                                                    |                      |
| Quotations presented                   | 29       | Were participant quotations presented to illustrate the themes/findings?<br>Was each quotation identified? e.g. participant number |                      |
| Data and findings consistent           | 30       | Was there consistency between the data presented and the findings?                                                                 |                      |
| Clarity of major themes                | 31       | Were major themes clearly presented in the findings?                                                                               |                      |
| Clarity of minor themes                | 32       | Is there a description of diverse cases or discussion of minor themes?                                                             |                      |

Developed from: Tong A, Sainsbury P, Craig J. Consolidated criteria for reporting qualitative research (COREQ): a 32-item checklist for interviews and focus groups. *International Journal for Quality in Health Care*. 2007. Volume 19, Number 6: pp. 349 – 357

**Once you have completed this checklist, please save a copy and upload it as part of your submission. DO NOT include this checklist as part of the main manuscript document. It must be uploaded as a separate file.**

# BMJ Open

## **“I also take part in caring for the sick child” - A qualitative study on fathers’ roles and responsibilities in seeking care for children in Southwest Ethiopia**

|                                 |                                                                                                                                                                                                                                                                                                                                          |
|---------------------------------|------------------------------------------------------------------------------------------------------------------------------------------------------------------------------------------------------------------------------------------------------------------------------------------------------------------------------------------|
| Journal:                        | <i>BMJ Open</i>                                                                                                                                                                                                                                                                                                                          |
| Manuscript ID                   | bmjopen-2020-038932.R1                                                                                                                                                                                                                                                                                                                   |
| Article Type:                   | Original research                                                                                                                                                                                                                                                                                                                        |
| Date Submitted by the Author:   | 25-May-2020                                                                                                                                                                                                                                                                                                                              |
| Complete List of Authors:       | Funk, Tjede; Karolinska Institute, Global Public Health<br>Källander, Karin; Karolinska Institutet, Department of Global Public Health<br>Abebe, Ayalkibet; Malaria Consortium<br>Alfvén, Tobias ; Karolinska Institute, Department of Global Public Health<br>Alvesson, Helle; Karolinska Institute, Department of Global Public Health |
| <b>Primary Subject Heading</b>: | Global health                                                                                                                                                                                                                                                                                                                            |
| Secondary Subject Heading:      | Global health, Qualitative research                                                                                                                                                                                                                                                                                                      |
| Keywords:                       | Community child health < PAEDIATRICS, QUALITATIVE RESEARCH, PUBLIC HEALTH                                                                                                                                                                                                                                                                |
|                                 |                                                                                                                                                                                                                                                                                                                                          |

SCHOLARONE™  
Manuscripts

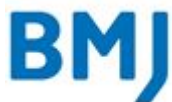

I, the Submitting Author has the right to grant and does grant on behalf of all authors of the Work (as defined in the below author licence), an exclusive licence and/or a non-exclusive licence for contributions from authors who are: i) UK Crown employees; ii) where BMJ has agreed a CC-BY licence shall apply, and/or iii) in accordance with the terms applicable for US Federal Government officers or employees acting as part of their official duties; on a worldwide, perpetual, irrevocable, royalty-free basis to BMJ Publishing Group Ltd ("BMJ") its licensees and where the relevant Journal is co-owned by BMJ to the co-owners of the Journal, to publish the Work in this journal and any other BMJ products and to exploit all rights, as set out in our [licence](#).

The Submitting Author accepts and understands that any supply made under these terms is made by BMJ to the Submitting Author unless you are acting as an employee on behalf of your employer or a postgraduate student of an affiliated institution which is paying any applicable article publishing charge ("APC") for Open Access articles. Where the Submitting Author wishes to make the Work available on an Open Access basis (and intends to pay the relevant APC), the terms of reuse of such Open Access shall be governed by a Creative Commons licence – details of these licences and which [Creative Commons](#) licence will apply to this Work are set out in our licence referred to above.

Other than as permitted in any relevant BMJ Author's Self Archiving Policies, I confirm this Work has not been accepted for publication elsewhere, is not being considered for publication elsewhere and does not duplicate material already published. I confirm all authors consent to publication of this Work and authorise the granting of this licence.

1  
2  
3 1 “I also take part in caring for the sick child” - A qualitative study on fathers’ roles  
4  
5  
6 2 and responsibilities in seeking care for children in Southwest Ethiopia  
7  
8  
9  
10 3  
11

12 4 Tjede Funk<sup>1\*</sup>, Karin Källander<sup>1,2,3</sup>, Ayalkibet Abebe<sup>4</sup>, Tobias Alfvén<sup>1,5#</sup>, Helle Mølsted  
13  
14 5 Alvesson<sup>1#</sup>  
15  
16  
17  
18 6  
19  
20

- 21 7 1 Department of Global Public Health, Karolinska Institute, Stockholm, Sweden  
22 8 2 Malaria Consortium, London, United Kingdom  
23 9 3 UNICEF, New York, USA  
24 10 4 Malaria Consortium, Addis Ababa, Ethiopia  
25 11 5 Sachs’ Children and Youth Hospital, Stockholm South General Hospital, Stockholm,  
26 12 Sweden  
27  
28  
29  
30

31  
32 13 # These authors have contributed equally to this work  
33

34 14 \* Corresponding author: Email: [tjede.funk@ki.se](mailto:tjede.funk@ki.se)  
35  
36  
37

38 15 Key words: Fathers, Child, Care-seeking, Ethiopia, Qualitative Research  
39  
40  
41  
42 17  
43  
44  
45  
46  
47  
48  
49  
50  
51  
52  
53  
54  
55  
56  
57  
58  
59  
60

1  
2  
3 18 **ABSTRACT**  
4  
5

6 19 **Objectives:** Fathers play an important role in household decision making processes and child  
7  
8 20 health development. Nevertheless, they are underrepresented in child health research, especially  
9  
10 21 in low-income settings. Little is known about what roles fathers play in the care seeking  
11  
12 22 processes or how they interact with the health system when their child is sick. This study aimed  
13  
14 23 to understand Ethiopian fathers' roles and responsibilities in caring for their children when they  
15  
16 24 are or become ill.  
17  
18  
19

20  
21 25 **Design:** Qualitative study using semi-structured interviews with fathers.  
22  
23

24 26 **Setting:** This study was conducted in three rural districts of the Southern Nations, Nationalities  
25  
26 27 and People's Region of Ethiopia.  
27  
28

29 28 **Participants:** Twenty-four fathers who had at least one child between 2 and 59 months who  
30  
31 29 visited a health extension worker with fever.  
32  
33

34 30 **Results:** The overarching theme was "Changing perceptions of paternal responsibilities during  
35  
36 31 children's ill health". It constituted three sub-themes, namely "Fathers' burden of earning  
37  
38 32 money for care", "Fatherhood entails advocating children's health care needs" and "Investing  
39  
40 33 in children's health can benefit the family in the future". Fathers described that they were the  
41  
42 34 ones mainly responsible for the financial arrangement of care and that this financial  
43  
44 35 responsibility can involve stress when resources are scarce. Fathers knew what health services  
45  
46 36 were available and accessible to them and were involved in different ways in the care-seeking  
47  
48 37 of the child. Changes in the importance ascribed to child health were expressed by fathers who  
49  
50 38 described being more alert to children's ill-health.  
51  
52  
53

54  
55  
56 39 **Conclusion:** Fathers play various roles in the care-seeking process during children's illness  
57  
58 40 episodes. This included for instance arranging resources to seek care, (co-)deciding where to  
59  
60

1  
2  
3 41 seek care as well as accompanying the child to the health facility. The inability to organise  
4  
5 42 necessary resources for care can lead to involuntary delays in care-seeking for the child. This  
6  
7 43 demonstrates the importance of including fathers in future interventions on maternal and child  
8  
9 44 health.

10  
11  
12  
13 45

## 16 46 **STRENGTH AND LIMITATIONS OF THE STUDY**

- 17  
18  
19 47
- 20 • This study distinguishes itself from others by only focusing on fathers and their  
21 perceived roles and responsibilities in the care seeking for sick children, which is an  
22 48 underrepresented area in child health research.
  - 23  
24 49
  - 25 • This study used a nested stratified sample and included 24 fathers from highest and  
26 50 lowest socio-economic quintiles and with few (1-2) or many children (3+) in order to  
27 provide rich information.
  - 28 51
  - 29 • We sought to mitigate a social desirability bias by having the interviews conducted by  
30 52 male interviewers in two local languages.
  - 31 53
  - 32 • We did not conduct interviews with mothers to confirm the fathers' responses.  
33 54  
34 55  
35  
36  
37  
38  
39  
40  
41 56  
42  
43

## 44 57 **INTRODUCTION**

45  
46  
47 58 Annually approximately 5.3 million children die worldwide before reaching their fifth birthday.  
48  
49 59 Most of these deaths occur following the neonatal period and are caused by diseases such as  
50  
51 60 malaria, pneumonia and diarrhoea [1]. It is further estimated that malnutrition contributes to  
52  
53 61 almost half of child deaths under the age of five and that many of the childhood deaths could  
54  
55 62 have been prevented with simple, effective and available interventions [1]. Nevertheless,  
56  
57 63 caregivers of sick children in poor communities often face obstacles in seeking healthcare, such  
58  
59  
60

64 as lack of money or distance to the care facility [2, 3]. Evidence from Ethiopia shows that only  
65 35% of children with fever and 44% of children with diarrhoea in the previous two weeks were  
66 brought for treatment [4].

67 Decision making processes regarding child health care are complex. Although mothers have  
68 historically been seen as responsible for their children and their health, multiple studies from  
69 low-resource settings show that women, as compared to men, have relatively low decision-  
70 making power when it comes to health care decisions for themselves and their children [5-8].  
71 A study from The Gambia [9] states that mothers decided when to take the child to the hospital  
72 for cerebral malaria in only around 7% of the cases. Other studies confirm that it is mainly the  
73 father who makes the final call on where and when to seek health care [9-11].

74 The important role of fathers in child health and development is becoming better understood  
75 and appreciated. Literature shows that involved fathers are associated with different positive  
76 outcomes, such as knowledge of newborn danger signs among mothers, skilled birth and  
77 attendance of antenatal care visits [12-14]. Some countries have therefore started to address the  
78 involvement of fathers in their road maps to reduce maternal and child morbidity and mortality  
79 [15, 16]. Yet, in low-and middle-income countries only a minority of fathers has been said to  
80 be engaged with their children [17]. Yet different forms of engagement and types of fathers  
81 exist. In a study conducted in Ethiopia, fathers were categorised into three different groups,  
82 depending on their perceptions, practices, and challenges towards routine child care and feeding  
83 [18]: 1) Traditional fathers who “do not feel part of routine child care, and they fully believe  
84 child care is only the mothers’ responsibility”; 2) Transitional fathers who “perceive child care  
85 as being both the mothers’ and fathers’ responsibility”, but under different conditions (e.g.  
86 availability of the father or occupied mother), meaning the father does not completely feel  
87 responsible for child care and 3) Modern fathers who “perceive child care and child feeding as  
88 a shared responsibility between mother and father” and who are totally involved in their child’s

1  
2  
3 89 life. This indicates that not all fathers are alike and that differences in their roles can exist  
4  
5 90 between them.  
6  
7

8 91 A number of studies from Africa have shown that fathers are often the main decision-maker or  
9  
10 92 breadwinner of the family and responsible to pay for healthcare costs [10, 11]. Yet little is  
11  
12 93 known otherwise about what roles they take on in the care seeking process for their children or  
13  
14 94 how fathers interact with the health system when their children are sick. Therefore, this study  
15  
16 95 aims to understand fathers' roles and responsibilities in care-seeking for children in rural areas  
17  
18 96 of the Southern Nations, Nationalities and People's Region in Ethiopia.  
19  
20  
21  
22

23 97

## 24 25 98 **MATERIALS AND METHODS**

26  
27  
28  
29 99 The reporting of the methods has been guided by the criteria for reporting qualitative research  
30  
31 100 (COREQ) guidelines [19].  
32  
33

34 101

### 35 36 37 102 **Setting**

38  
39  
40 103 The interviews were conducted in Damot Gale, Boloso Sore and Halaba Special Woreda, three  
41  
42 104 *woredas* (districts) of the Southern Nations, Nationalities and People's Region (SNNPR) of  
43  
44 105 Ethiopia. The population of Ethiopia, similar to these three *woredas*, is predominantly (~80%)  
45  
46 106 living in rural areas. SNNPR is a very ethnically diverse region, inhabited by more than 80  
47  
48 107 different ethnic groups. To improve primary health care services in the country, particular in  
49  
50 108 rural areas, Ethiopia has been implementing a health extension program since 2003 [20].  
51  
52 109 Central to the program are health extension workers (HEW) who are trained for 12-months and  
53  
54 110 subsequently employed by the government to work in health posts directly in and with the  
55  
56 111 community [20, 21]. HEWs are women with at least a grade 10 education. Typically two HEWs  
57  
58  
59  
60



1  
2  
3 112 are assigned to one health post, serving an estimate of 3,000 - 5,000 people [20, 21]. HEW  
4  
5 113 provide key health promotion and prevention services, as well as a selection of curative  
6  
7 114 services; all services are free of charge [21, 22]. Although health posts are placed directly in a  
8  
9  
10 115 community, travel distances can vary from a walking distance of a few minutes to an hour or  
11  
12 116 more [23]. At the time of this study there were 150 health posts in the study area with a total of  
13  
14 117 284 HEW.

15  
16  
17 118 Child mortality rates in Ethiopia have been decreasing over the years and currently stand at 55.2  
18  
19 119 per 1000 live births, with mortality rates in SNNPR higher than the national average [4, 24].  
20  
21  
22 120 Traditional gender roles persist, particularly in rural areas, with a minority of women reporting  
23  
24 121 having the right to decide on their first marriage and having their husband help with household  
25  
26 122 chores. Around 40% use modern contraceptives including sterilisation, contraceptive pills,  
27  
28 123 condoms and implants, and even fewer, less than 30%, give birth in a health facility [4].  
29  
30 124 Twenty-eight per cent of women and 73% of men age 15-49 in the region work within the  
31  
32 125 agricultural sector.  
33  
34  
35  
36  
37 126

### 38 39 40 127 **Study design and data collection**

41  
42  
43 128 This qualitative study was nested within a community-based cluster randomised controlled non-  
44  
45 129 inferiority trial (cRCT). The design and results of this trial are published elsewhere, as is the  
46  
47 130 qualitative evaluation of HEW's and caregivers' perception of the recommendations [25-27].  
48  
49  
50  
51 131 For this study, twenty-four semi-structured interviews were conducted with fathers who had at  
52  
53 132 least one child aged 2 to 59 months presenting to the HEW with fever. Half of the interviews  
54  
55 133 (n=12) were conducted in Halaba *woreda*, eight in Boloso Sore and four in Damot Gale. Boloso  
56  
57 134 Sore and Damot Gale are culturally and linguistically similar which is why they together  
58  
59 135 represent half of the fathers interviewed.  
60

1  
2  
3 136 The sampling method was based on the assumption that health seeking practices and fathers'  
4  
5 137 decision-making power could differ by socio-economic position and number of children. We  
6  
7 138 therefore used stratified sampling to select half of the fathers from the lowest and the other half  
8  
9  
10 139 from the highest socio-economic quintile. Socio-economic quintiles were based on caregivers'  
11  
12 140 responses to questions about household assets, e.g. material of the house, toilet facility used,  
13  
14 141 availability of TV/radio or electricity in general. It should be kept in mind that a high socio-  
15  
16 142 economic quintile in this study is not equivalent to a high socio-economic status. Fathers in the  
17  
18 143 high socio-economic quintile can still be considered poor. Within the two strata, fathers with  
19  
20 144 few children (1-2) and fathers with multiple children (3 or more) were invited for an interview  
21  
22 145 to maximise the level of heterogeneity among the fathers. However, the information on number  
23  
24 146 of children reported in the cRCT did not always tally with the number of children mentioned  
25  
26 147 by the father during the interview, which is why most fathers (n=19/24) in this study had three  
27  
28 148 or more children. Once the father was randomly selected within each stratum, contact was  
29  
30 149 established through the HEW and fathers were personally visited in their community. When  
31  
32 150 fathers were not at home, contact was established via phone or with help of the HEW in the  
33  
34 151 community. Fathers were asked whether they would be willing to participate in the study. All  
35  
36 152 24 fathers agreed to participate, but two were not able complete the interview due to time  
37  
38 153 constrains.  
39  
40  
41  
42  
43  
44

45 154 An interview guide was developed informed by literature on health care seeking and gender  
46  
47 155 roles. It started with introductory questions about the father and the household to explore  
48  
49 156 fathers' educational background, profession and family composition. While this part was rather  
50  
51 157 structured, the interview guide then followed with open ended questions regarding fathers'  
52  
53 158 practices on the following issues: seeking advice or discussing health matters with other family  
54  
55 159 or community members; fever in children and fathers' understanding of fever; fathers'  
56  
57 160 knowledge on health providers in the community; their decision-making around health services  
58  
59  
60

1  
2  
3 161 and drivers that influenced their seeking health care. The interview ended with asking fathers  
4  
5 162 to compare care-seeking between different households and changes in practices and roles of  
6  
7 163 fathers over time. The interview guide was prepared in English and subsequently translated into  
8  
9  
10 164 Amharic.

11  
12  
13 165 Three male interviewers conducted the interviews, two in Boloso Sore and Damot Gale and one  
14  
15 166 in Halaba. The interviewers were selected based on their experience in qualitative research,  
16  
17 167 English proficiency, and educational background in health sciences. In Halaba, a male  
18  
19 168 interpreter was recruited for translations from Amharic to Halabigna (local language of Halaba)  
20  
21  
22 169 as the interviewer was not familiar with the local language. In Boloso Sore and Damot Gale  
23  
24 170 interviews were conducted in Wolaitegna by two interviewers who were from the district and  
25  
26  
27 171 thus familiar with the area and language. No interviewer met the fathers before the conduction  
28  
29 172 of the interviews.

30  
31  
32 173 All interviewers and the interpreter received a half-day training from authors TF and AA. The  
33  
34 174 training provided insights into the research background, the aim of the study and the sampling  
35  
36 175 of fathers. In addition, the interview procedure was thoroughly explained and the interview  
37  
38 176 guide and all questions were reviewed and discussed in detail. The importance of probing and  
39  
40 177 non-leading questions was emphasized. At the end of the training, any remaining language  
41  
42  
43 178 issues were addressed as the interview guide was prepared in Amharic but the interviews were  
44  
45  
46 179 conducted in the local language. After the training, every interviewer conducted one pilot  
47  
48 180 interview and changes to the interview guide were made accordingly. Based on the pilot  
49  
50  
51 181 interviews, interviewers received oral feedback on how to improve their interviewing and the  
52  
53 182 purpose of certain questions was repeated in order to improve the direction of their probing  
54  
55 183 questions.

1  
2  
3 184 The interviews were conducted in March 2017 and took between 34 and 70 minutes, with  
4  
5 185 interviews using an interpreter taking longer. All interviews were conducted in a quiet place  
6  
7 186 outside; the majority took place close to the father's home. Fathers were aged between 20 and  
8  
9 187 50 years and the number of children ranged between one and fourteen (see Table 1). In Halaba,  
10  
11 188 multiple fathers had two wives. The majority of fathers were farmers.

12  
13  
14  
15 189 All 24 interviews were digitally recorded, transcribed in Amharic and translated into English.  
16  
17 190 The interviewers in Boloso Sore and Damot Gale preferred to transcribe the interviews directly  
18  
19 191 in Amharic instead of Wolaitegna, due to the difficulty in writing the local language. After their  
20  
21 192 participation in the interview, fathers received 122.5 Birr in cash (~5.5 USD) to compensate for  
22  
23 193 their time. This amount equals the common local Malaria Consortium lunch allowance.  
24  
25  
26  
27

28 194

29 195

30 196

### 31 197 **Table 1 Characteristics of study participants**

32 198

33 199

### 34 200 **Ethical approval**

35  
36  
37  
38 201 This study was nested within a cRCT that was approved by the SNNPR Health Bureau Research  
39  
40 202 Ethical Review Committee (P02-6-19/4511). The trial is registered as NCT02926625. Written  
41  
42 203 and oral consent was obtained from all study participants. Confidentiality was ensured and the  
43  
44 204 aim of the study was explained to the fathers prior to the interview. They were informed about  
45  
46 205 the option to decline participation or drop out of the interview without any consequences.  
47  
48  
49  
50  
51  
52  
53  
54  
55  
56

### 57 206 **Patient and public involvement**

1  
2  
3 207 There was no involvement of patients/interviewees or the public in setting the research agenda  
4  
5 208 or formulating interview guides.  
6  
7

8 209

9  
10  
11 210 **Data analysis**  
12

13  
14 211 All 24 father interviews were included in the analysis, although two fathers did not complete  
15  
16 212 the interview. As these two fathers did answer a number of questions, it was seen as appropriate  
17  
18 213 to include the material provided by them in the analysis, even though it was not fully completed.  
19  
20 214 The transcripts were read multiple times and codes to the material were applied using the  
21  
22 215 qualitative data structuring software Nvivo version 11. Interviews were analysed using content  
23  
24 216 analysis [28]. The analysis was an iterative process involving reading of literature and repeated  
25  
26 217 reading of interview transcripts. The coding process was done in steps. TF conducted the initial  
27  
28 218 coding and discussions took place with HMA. After each meeting, changes to the codes were  
29  
30 219 made. Finally, codes were grouped, and themes identified, which were again discussed between  
31  
32 220 authors TF and HMA. All father interviews were analysed together, meaning that no  
33  
34 221 stratification by socio-economic quintiles and number of children of fathers (strata used for the  
35  
36 222 sample selection) took place for the analysis. However, after the coding of the data was done,  
37  
38 223 it was checked whether fathers from different strata were represented in each theme.  
39  
40  
41  
42  
43  
44

45 224

46  
47  
48 225

49  
50  
51 226 **RESULTS**  
52

53  
54 227 Three sub-themes emerged from the data: 1) Fathers' burden of earning money for care, 2)  
55  
56 228 Fatherhood entails advocating children's health care needs, and 3) Investing in children's health  
57  
58 229 can benefit the family in the future. The results are presented according to these themes and fed  
59  
60

1  
2  
3 230 into the overarching theme of “Changing perceptions of paternal responsibilities during  
4  
5 231 children’s ill health”.

6  
7  
8 232  
9

10  
11  
12 233 **Fathers’ burden of earning money for care**

13  
14  
15 234 Fathers described their roles and responsibilities in care-seeking for children mostly in terms of  
16  
17 235 financial responsibilities. They explained that their main role as father was to work and earn  
18  
19 236 money to be able to finance health care costs and, when necessary, transportation to the facility.  
20  
21 237 Fathers felt strongly that “*money matters*” when it comes to seeking care for children.  
22  
23  
24 238 Nevertheless, it was explained that they often did not have the necessary resources at hand to  
25  
26 239 finance health care costs. This was expressed by fathers from both socio-economic strata,  
27  
28 240 lowest and highest socio-economic quintile. Most fathers interviewed mentioned that health  
29  
30 241 care costs are financed through work or selling goods, animals or land. When not enough money  
31  
32 242 could be arranged, fathers would make other arrangements, such as borrowing money to pay  
33  
34 243 for health care costs. Fathers would either borrow money through *idir* [a financial community  
35  
36 244 support system where members can regularly contribute small amounts of money and in return  
37  
38 245 are able to borrow some money in case of need] or from family and friends. Mothers were often,  
39  
40 246 but not always, described as not having their own income source that could contribute to health  
41  
42 247 care expenses. Furthermore, mothers generally were described as having difficulties in  
43  
44 248 borrowing money as even though they would try to obtain a loan, they would often not receive  
45  
46 249 one [from *idir*]. Consequently, the burden on arranging resources for treatment was, according  
47  
48 250 to the fathers, mainly placed on them. The financial stress that fathers experience was described  
49  
50 251 by this father:

51  
52  
53  
54  
55  
56  
57 252 *We have idir where we save some amount of money regularly. I have to pay back the money*  
58  
59 253 *within 10 to 15 days. In case they don’t allow me [to borrow money] due to some*

1  
2  
3 254 *inconveniences, I borrow from friends, relatives, particularly from my grandmother. But the*  
4  
5 255 *reality is that I borrow again before I paid back the first loan. (ID 8; lowest socio-economic*  
6  
7 256 *quintile; 3+ children)*  
8  
9

10 257 One father also emphasised that it was easier for fathers with a better financial situation to  
11  
12 258 borrow money compared to fathers with few resources, which further emphasised the financial  
13  
14 259 worries that fathers were faced with.  
15  
16

17  
18 260 *The father with better financial resources can take his children to health providers easily. Even*  
19  
20 261 *if he doesn't have the money, he can borrow it easily because people believe that he can pay it*  
21  
22 262 *back. But if the poor wants to borrow money from friends or other people, people are not happy*  
23  
24 263 *to give him [money] because they are wondering 'from where is he going to pay me back?' (ID*  
25  
26 264 *4; lowest socio-economic quintile; 3+ children)*  
27  
28

29  
30 265 In addition, fathers also mentioned that care-seeking for their child can be delayed if they have  
31  
32 266 no money at hand, and sometimes it could take several days to find the necessary resources to  
33  
34 267 finance health care costs. Consequently, it was expressed that even if a father wanted to seek  
35  
36 268 care immediately, this was not always possible. Fathers from both socio-economic strata  
37  
38 269 mentioned such financial worries and constraints.  
39  
40

41  
42  
43 270 *[...] if we go to [name of] hospital, we may pay up to 1000 birr (~36 USD). Even if we only*  
44  
45 271 *stay one night there, they charge us 700 up to 800 birr (~25-30 USD). The more we stay there,*  
46  
47 272 *the more money we are expected to pay. If we don't have money, we are left with staying home*  
48  
49 273 *with the sick child and praying to God. (ID 15; lowest socio-economic quintile; 3+ children)*  
50  
51

52  
53 274

54  
55  
56 275 **Fatherhood entails advocating children's health care needs**  
57  
58  
59  
60

1  
2  
3 276 Fathers were well aware of the different health services available to their children, whether it  
4  
5 277 was the health post, health centre, private or traditional providers. They stated that they  
6  
7 278 discussed with their wives on what actions to take and where to take the child when it is sick.  
8  
9  
10 279 However, many of them still saw themselves as the ultimate decision maker whose suggestion  
11  
12 280 will be followed.

13  
14  
15 281 *Since I bear more responsibility as father on my family's affairs, it is my decision that needs to*  
16  
17 282 *be adhered to. Since she [wife] doesn't have an income generating work and we solely depend*  
18  
19 283 *on the income I get, it is me who decides over issues. (ID 15; lowest socio-economic quintile;*  
20  
21 284 *3+ children)*

22  
23  
24  
25 285 Different factors can influence the choice as to which provider a child is taken. The type of  
26  
27 286 illness the child has can be such a factor. When the child was suspected of having a bone fracture  
28  
29 287 or a dislocation, multiple fathers explained that traditional healers also referred to as “bone  
30  
31 288 setter” are the first choice of treatment. If the traditional treatment is not effective, other sources  
32  
33 289 of treatment will be sought. For other types of illnesses, a father would directly take the child  
34  
35 290 to a different health provider, such as the health post.

36  
37  
38  
39  
40 291 Money was also explained to be a decisive factor in the care-seeking process. According to  
41  
42 292 fathers the availability of money and resources provides a freedom in choosing a health provider  
43  
44 293 for the child's health condition. This freedom is constrained if resources are scarce.

45  
46  
47 294 *Rich [people] take sick children directly to hospital. But since poor [people] have no money,*  
48  
49 295 *they take [the child] to the health post. They only take [the child] to the hospital when its*  
50  
51 296 *condition is life threatening. (ID 8)*

52  
53  
54  
55 297 Multiple fathers seemed to prefer the health centre over the health post, because more and better  
56  
57 298 treatment was believed to be available there. It was stressed that the general perception is that  
58  
59 299 treatment was better in urban areas and also faster at private providers, though private providers



1  
2  
3 300 were expensive and described as business-oriented. Nevertheless, if the money was available,  
4  
5 301 some fathers still preferred private services over public facilities. Fathers observed a formal  
6  
7 302 care chain (or “*hierarchy*”) in health care. They described that health centres expected them to  
8  
9 303 have a referral slip from the health post, making it harder for them to directly access treatment  
10  
11 304 at the health centre. This was seen as an obstacle in seeking care.  
12  
13  
14

15 305 The responsibility for bringing or accompanying a sick child for treatment was unclear.  
16  
17 306 Bringing the child to a health post for treatment was first seen as being a responsibility of the  
18  
19 307 mother. Mothers were described to be responsible for bringing the children who were breastfed  
20  
21 308 to the health provider, whereas fathers claimed to rather accompany older children that could  
22  
23 309 walk or sit on a motorcycle to the health provider. Whether or not a father brought or  
24  
25 310 accompanied a child to a health facility also depended on the health facility in question. One  
26  
27 311 father explained that the mother sought care at the health post alone, but fathers needed to be  
28  
29 312 consulted to seek care at the health centre or higher-level facilities, often implying more severe  
30  
31 313 illnesses and higher costs.  
32  
33  
34  
35

36  
37 314 *When the mother notices that the child is sick, she takes her [the child] to health post. If the*  
38  
39 315 *health post advises her [the mother] to take the child to the health centre [i.e. refers the child*  
40  
41 316 *as the health problem is not identified or manageable at community level], she returns back*  
42  
43 317 *and waits for my return. After I return back to home, we together take the child to the health*  
44  
45 318 *centre together. (ID 15; lowest socio-economic quintile; 3+ children)*  
46  
47  
48

49 319 If the child needed to stay at the hospital, a father described it as his role to stay with the child.  
50  
51 320 In addition, the arrangement of the transportation to the health facility was, according to some  
52  
53 321 fathers, also their role.  
54  
55  
56

## 57 322 **Investing in children’s health can benefit the family in the future**

58  
59

60 323 Behaviours of fathers with regards to seeking care for children has changed over time. It was

1  
2  
3 324 explained that fathers today are more involved in child health matters compared to the past and  
4  
5 325 that they do not leave this issue entirely up to the mothers anymore. Fathers stated being more  
6  
7 326 alert about changes in health status of their children and that they will not rely only on faith to  
8  
9 327 cure the child.

10  
11  
12  
13 328 *I can say that the love I have to my children is stronger than the mother's love. Due to that*  
14  
15 329 *reason, I also closely follow their [the children's] health situation. (ID 4; lowest socio-*  
16  
17 330 *economic quintile; 3+ children)*

18  
19  
20  
21 331 A couple of fathers pointed out the value that children have and can bring in the future, for  
22  
23 332 instance through working and supporting the family financially. Consequently, fathers stated  
24  
25 333 they paid more attention to their child's health status and made sure that they recovered.

26  
27  
28 334 *In past time, there were widely held assumptions among fathers that a child will grow by his*  
29  
30 335 *fate so that no worries are needed. But this belief is changing as those sons and daughters that*  
31  
32 336 *work at urban centres and abroad send [money] and augment their family's income. Children*  
33  
34 337 *now are believed to be assets and obtain great care. So fathers are alert whenever they observe*  
35  
36 338 *changes in their children's health. (ID 18; highest socio-economic quintile; 3+ children)*

37  
38  
39  
40  
41 339 Fathers also observed changes in the health services over time. They noticed that health posts  
42  
43 340 that are now existing in their community were not available in the past.

44  
45  
46 341

47  
48 342

49  
50  
51 343 **DISCUSSION**

52  
53  
54 344 This study indicates that fathers are involved in the care-seeking of their sick child in different  
55  
56 345 ways. This includes bearing the main responsibility for arranging financial resources to enable  
57  
58 346 a health care visit and this responsibility can imply stress and financial concerns when resources  
59  
60

1  
2  
3 347 are scarce. Fathers are well aware of the health services available to their children and they  
4  
5 348 described being involved in the care-seeking process in different ways, e.g. (co-)deciding where  
6  
7 349 to take the child or accompanying their child to the health facility. Fathers explained that  
8  
9  
10 350 changes in fathers' perception on children and their involvement have taken place. They  
11  
12 351 described themselves being more aware of the health status of their children and more involved  
13  
14 352 in child health matters compared to the past.

15  
16  
17  
18 353 This transitional change in fathers' perceptions of their children has been described in another  
19  
20 354 study conducted in Ethiopia [29]. Multiple fathers interviewed in this study would fit into the  
21  
22 355 "transitional fathers" category. According to them, child health issues are not seen as only a  
23  
24 356 task of the mother anymore. It seems as if these fathers acknowledge these responsibilities as  
25  
26 357 being part of their role as father. The findings of this study show that not all fathers take on the  
27  
28 358 same roles in care-seeking for children. This suggests that roles in these rural areas are changing  
29  
30 359 and that with continuous country efforts, fathers' roles as caregiver could be strengthened.

31  
32  
33  
34 360 Also, the phrasing of the last theme "Investing in children's health can benefit family in the  
35  
36 361 future" seems very timely, considering that a recently published report by the WHO-UNICEF-  
37  
38 362 Lancet Commission highlights the importance and benefits of investing in children [30]. It is  
39  
40 363 noteworthy that fathers did not only observe changes in paternal behaviour, but also appreciated  
41  
42 364 changes in the availability of health services, e.g. the establishment of a health post in their  
43  
44 365 community.

45  
46  
47  
48  
49 366 The responsibility of fathers for household finances and financing of care have been described  
50  
51 367 in multiple previous studies [10, 11, 31-33]. This study coincided with these findings, but also  
52  
53 368 shed light on the burden that this responsibility brings when a child is ill. The reality described  
54  
55 369 by fathers was that often resources were not available to finance health care costs, and that in  
56  
57 370 many cases fathers needed to borrow money again before having paid back their first debt. It  
58  
59  
60

1  
2  
3 371 appears to be a vicious circle in which particularly very poor fathers are placed, and  
4  
5 372 demonstrates the difficult situations that these families go through in times of sickness. It is  
6  
7 373 important to stress that both groups of fathers (highest and lowest socio-economic quintile)  
8  
9 374 expressed concerns in arranging resources and money and would compare themselves with  
10  
11 375 better-off fathers. The comparisons expressed by these fathers therefore do not refer to a  
12  
13 376 comparison between the two socio-economic quintile groups in this study.  
14  
15  
16

17  
18 377 The inability to arrange money to pay for health care costs can lead to involuntary delays in  
19  
20 378 care-seeking. The link between costs and delayed health care has been previously described in  
21  
22 379 the literature [34, 35]. These findings suggest that besides educating parents on danger signs  
23  
24 380 and when to seek care, it is very important to have health care infrastructure in place and health  
25  
26 381 facilities accessible to the communities. The Sustainable Development Goal 3.8 touches upon  
27  
28 382 this as it aims to “achieve universal health coverage, including financial risk protection [and]  
29  
30 383 access to quality essential health-care services (...)” [36]. In order to further improve maternal  
31  
32 384 and child health, health services should be made accessible to all, both physically and  
33  
34 385 economically [37].  
35  
36  
37  
38

39 386 In this study multiple fathers stated that they discuss and decide together with their wives on  
40  
41 387 what to do when their child is sick. Nevertheless, many of these fathers still saw themselves as  
42  
43 388 final decision-makers whose opinions should be adhered to. Literature supports that fathers  
44  
45 389 often are the decision-maker of the household [9, 11], which raises questions on the true  
46  
47 390 influence of mothers’ opinions on the decision-making processes. It is known that fathers play  
48  
49 391 an important role in a children’s development. Positive involvement of fathers can impact not  
50  
51 392 only children’s cognitive skills, but also their social competences and behavioural or emotional  
52  
53 393 outcomes [38-40]. This shows, together with fathers’ important role as decision-maker and  
54  
55 394 breadwinner in the care-seeking process, that there is a strong need for including fathers in  
56  
57 395 future interventions aimed at improving maternal and child health. It is thereby crucial to  
58  
59  
60

1  
2  
3 396 consider that many fathers spend much of their time away from home because of their work.  
4

5 397 Interventions need to be formulated accordingly.  
6  
7

8 398 Another interesting finding of this study was that fathers were not only involved in household  
9  
10 399 decision-making and finances, but were also directly in contact with the health system for their  
11  
12 400 children. Fathers were not only well aware of the different health providers available or  
13  
14 401 accessible to them, but also described bringing the child to the health facility or accompanying  
15  
16 402 the mother. We did not come across a study that discussed similar findings.  
17  
18  
19

## 20 21 403 **STRENGTHS AND WEAKNESSES** 22

23 404 This study focussed on fathers of both low and high socioeconomic quintiles in order to  
24  
25 405 contribute to current literature as fathers remain underrepresented in child health research. We  
26  
27 406 conducted interviews in the local language in Boloso Sore and Damot Gale but in Halaba we  
28  
29 407 overcame language diversity through use of a local interpreter. Two interviews in Halaba were  
30  
31 408 not finalised due to other obligations of the father. As these selected fathers have not been  
32  
33 409 replaced, some information was lost. However, due to the large number of interviews conducted  
34  
35 410 we have obtained sufficient information. Multiple findings of this study coincided with previous  
36  
37 411 literature. We thus assume that these findings are transferable to communities with similar  
38  
39 412 family structures and cultural contexts and health systems. Furthermore, a social desirability  
40  
41 413 bias (e.g. father claiming to be more involved in the care-seeking process than they actually  
42  
43 414 are) cannot be excluded with certainty in this study. Also, we did not conduct interviews with  
44  
45 415 mothers to check or confirm fathers' responses. Nevertheless, we aimed to mitigate the chances  
46  
47 416 of a desirability bias by using male interviewers. We therefore believe that the information  
48  
49 417 provided does reflect their roles and perceptions well.  
50  
51  
52  
53  
54  
55

56 418

## 57 58 59 419 **CONCLUSIONS** 60

1  
2  
3 420 Fathers play an important role in the care-seeking process of their children. Not only do they  
4  
5 421 have decision-making power and the financial responsibility, but they are also otherwise  
6  
7 422 involved in the care-seeking process, such as arranging transportation or accompanying the  
8  
9 423 child at times to the facility. Fathers are familiar with the health services available to their  
10  
11 424 children and even noticed positive changes in the paternal involvement in childcare, as well as  
12  
13 425 availability of health services through the establishment of health posts in their communities.  
14  
15 426 Efforts need to be made to continue the observed positive trend in fathers' involvement in care  
16  
17 427 seeking described in this study. Future research on maternal and child health needs continue  
18  
19 428 considering and highlighting fathers' roles and responsibilities. The inability to organise  
20  
21 429 necessary resources for care can lead to involuntary delays in care-seeking for the child. It is  
22  
23 430 therefore crucial to continue strengthening health care systems and making health services more  
24  
25 431 accessible to communities, both physically and financially.  
26  
27  
28  
29  
30  
31  
32  
33

### 34 433 **ACKNOWLEDGEMENTS**

35  
36 434 We thank the Federal Ministry of Health in Ethiopia, the Regional Health Bureau in  
37  
38 435 SNNPR (in particular, our technical advisor, Dr. Habtamu Beyene), and the woreda offices in  
39  
40 436 Damot Gale, Boloso Sore and Halaba. We extend our thanks to all fathers we interviewed for  
41  
42 437 granting us their time and being willing to share their experiences. Finally, we would like to  
43  
44 438 acknowledge Tesfahun Tadesse, Muluken Tamirat, Tessema Awano for conducting the  
45  
46 439 interviews and Ahmedin Alemu for functioning as interpreter.  
47  
48  
49  
50

51 440

52  
53  
54 441

### 55 56 442 **FUNDING STATEMENT**

1  
2  
3 443 This work was part of the Translating Research into Action (TRAction) and funded by the  
4  
5 444 President's Malaria Initiative and United States Agency for International Development  
6  
7 445 (USAID) under cooperative agreement No.GHS-A-00-09-00015-00.  
8  
9

10  
11 446

#### 12 13 14 447 **COMPETING INTEREST**

15  
16  
17 448 The authors declare that they have no competing interest.  
18  
19

20  
21 449

#### 22 23 450 **AUTHORS' CONTRIBUTION**

24  
25  
26 451 All authors were involved in conceiving and designing the study. TF, KK, TA and HMA  
27  
28 452 developed the study plan and formulated the interview guide. TF and AA were training the  
29  
30 453 interviewers and following the interview process. TF and HMA analysed the interviews. TF  
31  
32 454 wrote the paper together with all other authors. All authors read and approved the final version  
33  
34 455 of this paper.  
35  
36  
37  
38  
39  
40  
41

42  
43 456

#### 44 45 457 **DATA SHARING STATEMENT**

46  
47 458 All relevant data for this study are included in this paper. To protect the anonymity of our  
48  
49 459 respondents, full transcripts will not be provided.  
50  
51  
52  
53  
54  
55  
56  
57  
58  
59

60  
61 46062  
63 46164  
65 462

#### 66 67 463 **REFERENCES**



- 1  
2  
3 464 1. World Health Organization. *Children: reducing mortality*. 2019 [cited 05 May 2020];  
4 465 Available from: [https://www.who.int/news-room/fact-sheets/detail/children-reducing-  
6 467 mortality](https://www.who.int/news-room/fact-sheets/detail/children-reducing-<br/>5 466 mortality).
- 7 467 2. Schellenberg, J.A., et al., *Inequities among the very poor: health care for children in  
8 468 rural southern Tanzania*. The Lancet, 2003. **361**(9357): p. 561-566.
- 9 469 3. Lama, T.P., et al., *Illness recognition, decision-making, and care-seeking for maternal  
10 470 and newborn complications: a qualitative study in Sarlahi District, Nepal*. Journal of  
11 471 Health, Population and Nutrition, 2017. **36**(1): p. 45.
- 12 472 4. Central Statistical Agency (CSA) [Ethiopia], ICF, and *Ethiopia Demographic and  
13 473 Health Survey 2016*. 2016, CSA and ICF.: Addis Ababa, Ethiopia, and Rockville,  
14 474 Maryland, USA.
- 15 475 5. Fantahun, M., et al., *Women's involvement in household decision-making and  
16 476 strengthening social capital—crucial factors for child survival in Ethiopia*. Acta  
17 477 paediatrica, 2007. **96**(4): p. 582-589.
- 18 477 6. Senarath, U. and N.S. Gunawardena, *Women's autonomy in decision making for health  
19 478 care in South Asia*. Asia Pacific Journal of Public Health, 2009. **21**(2): p. 137-143.
- 20 479 7. Alemayehu, M. and M. Meskele, *Health care decision making autonomy of women  
21 480 from rural districts of Southern Ethiopia: a community based cross-sectional study*.  
22 481 International journal of women's health, 2017. **9**: p. 213.
- 23 482 8. Osamor, P.E. and C. Grady, *Women's autonomy in health care decision-making in  
24 483 developing countries: a synthesis of the literature*. International journal of women's  
25 484 health, 2016. **8**: p. 191.
- 26 484 9. Okoko, B.J. and L.K. Yamuah, *Household decision-making process and childhood  
27 485 cerebral malaria in The Gambia*. Archives of medical research, 2006. **37**(3): p. 399-  
28 486 402.
- 29 487 10. Abubakar, A., et al., *Socio-cultural determinants of health-seeking behaviour on the  
30 488 Kenyan coast: a qualitative study*. PloS one, 2013. **8**(11): p. e71998.
- 31 489 11. Ellis, A.A., et al., *Household roles and care-seeking behaviours in response to severe  
32 490 childhood illness in Mali*. Journal of Biosocial Science, 2013. **45**(6): p. 743-759.
- 33 491 12. Zaman, S.B., et al., *Husband's involvement with mother's awareness and knowledge  
34 492 of newborn danger signs in facility-based childbirth settings: a cross-sectional study  
35 493 from rural Bangladesh*. BMC research notes, 2018. **11**(1): p. 286.
- 36 494 13. Mangeni, J.N., et al., *Male involvement in maternal healthcare as a determinant of  
37 495 utilisation of skilled birth attendants in Kenya*. East African medical journal, 2012.  
38 496 **89**(11): p. 372-383.
- 39 497 14. Yargawa, J. and J. Leonardi-Bee, *Male involvement and maternal health outcomes:  
40 498 systematic review and meta-analysis*. J Epidemiol Community Health, 2015: p. jech-  
41 499 2014-204784.
- 42 500 15. Malawi Ministry of Health, *Road Map for Accelerating the reduction of Maternal and  
43 501 Neonatal Morbidity and Mortality in Malawi*. 2012.
- 44 502 16. Tanzania Ministry of Health, et al., *The National Road Map Strategic Plan to improve  
45 503 reproductive, maternal, newborn, child & adolescent health in Tanzania (2016-2020)*.  
46 504 2016: Dar es Salaam.
- 47 505 17. Jeong, J., et al., *Paternal stimulation and early child development in low-and middle-  
48 506 income countries*. Pediatrics, 2016. **138**(4): p. e20161357.
- 49 507 18. Bilal, S., et al., *Fathers' Perception, Practice, and Challenges in Young Child Care  
50 508 and Feeding in Ethiopia*. Food and nutrition bulletin, 2016. **37**(3): p. 329-339.
- 51 509 19. Tong, A., P. Sainsbury, and J. Craig, *Consolidated criteria for reporting qualitative  
52 510 research (COREQ): a 32-item checklist for interviews and focus groups*. International  
53 511 journal for quality in health care, 2007. **19**(6): p. 349-357.
- 54 512  
55 513



- 1  
2  
3 514 20. Assefa, Y., et al., *Community health extension program of Ethiopia, 2003–2018: successes and challenges toward universal coverage for primary healthcare services*. Globalization and health, 2019. **15**(1): p. 24.
- 4 515  
5 516  
6 517 21. Legesse, H., et al., *National scale-up of integrated community case management in rural Ethiopia: Implementation and early lessons learned*. Ethiop Med J, 2014. **52**: p. 15-26.
- 7 518  
8 519  
9 520 22. Wang, H., et al., *Ethiopia health extension program: an institutionalized community approach for universal health coverage*. 2016: The World Bank.
- 10 521  
11 522 23. Okwaraji, Y.B., et al., *The association between travel time to health facilities and childhood vaccine coverage in rural Ethiopia. A community based cross sectional study*. BMC public health, 2012. **12**(1): p. 476.
- 12 523  
13 524  
14 525 24. UNICEF. *Country profiles: Ethiopia*. 201 [cited 2020 25 May]; Available from: <https://data.unicef.org/country/eth/>.
- 15 526  
16 527 25. Källander, K., et al., *Universal versus conditional day 3 follow-up for children with non-severe unclassified fever at the community level in Ethiopia: A cluster-randomised non-inferiority trial*. PLoS medicine, 2018. **15**(4): p. e1002553-e1002553.
- 17 528  
18 529  
19 530 26. Källander, K., et al., *Universal versus conditional third day follow-up visit for children with nonsevere unclassified fever at the community level in Ethiopia: Protocol for a cluster randomized noninferiority trial*. JMIR research protocols, 2018. **7**(4): p. e99-e99.
- 20 531  
21 532  
22 533  
23 534 27. Funk, T., et al., *Management and follow-up practices of children with unclassified fever in rural Ethiopia: experiences of health extension workers and caregivers*. The American journal of tropical medicine and hygiene, 2018. **99**(5): p. 1255-1261.
- 24 535  
25 536  
26 537 28. Elo, S. and H. Kyngäs, *The qualitative content analysis process*. Journal of Advanced Nursing, 2008. **62**(1): p. 107-115.
- 27 538  
28 539 29. Bilal, S., *The fathers' role in child nutrition in Ethiopia*. 2015: Maastricht University.
- 29 540  
30 541 30. Clark, H., et al., *A future for the world's children? A WHO–UNICEF–Lancet Commission*. The Lancet, 2020. **395**(10224): p. 605-658.
- 31 542  
32 543 31. Ewing, V.L., et al., *Increasing understanding of the relationship between geographic access and gendered decision-making power for treatment-seeking for febrile children in the Chikwawa district of Malawi*. Malaria journal, 2016. **15**(1): p. 521.
- 33 544  
34 545 32. Montgomery, C.M., et al., *'To help them is to educate them': power and pedagogy in the prevention and treatment of malaria in Tanzania*. Tropical Medicine & International Health, 2006. **11**(11): p. 1661-1669.
- 35 546  
36 547  
37 548 33. Tolhurst, R. and F.K. Nyonator, *Looking within the household: gender roles and responses to malaria in Ghana*. Transactions of the Royal Society of Tropical Medicine and Hygiene, 2006. **100**(4): p. 321-326.
- 38 549  
39 550  
40 551 34. Getahun, A., K. Deribe, and A. Deribew, *Determinants of delay in malaria treatment-seeking behaviour for under-five children in south-west Ethiopia: a case control study*. Malaria Journal, 2010. **9**(1): p. 320.
- 41 552  
42 553  
43 554 35. Hildenwall, H., et al., *"I never had the money for blood testing"—Caretakers' experiences of care-seeking for fatal childhood fevers in rural Uganda—a mixed methods study*. BMC international health and human rights, 2008. **8**(1): p. 12.
- 44 555  
45 556  
46 557 36. United Nations. *Sustainable Development Goals*. [cited 2019 14 January ]; Available from: <https://sustainabledevelopment.un.org/>.
- 47 558  
48 559 37. Tanou, M. and Y. Kamiya, *Assessing the impact of geographical access to health facilities on maternal healthcare utilization: evidence from the Burkina Faso demographic and health survey 2010*. BMC Public Health, 2019. **19**(1): p. 838.
- 49 560  
50 561  
51 562 38. Rollè, L., et al., *Father Involvement and Cognitive Development in Early and Middle Childhood: A Systematic Review*. Frontiers in psychology, 2019. **10**: p. 2405.
- 52 563  
53  
54  
55  
56  
57  
58  
59  
60

- 1  
2  
3 564 39. Torres, N., et al., *Domains of father involvement, social competence and problem*  
4 565 *behavior in preschool children*. Journal of Family Studies, 2014. **20**(3): p. 188-203.  
5 566 40. Kroll, M.E., et al., *Early father involvement and subsequent child behaviour at ages 3,*  
6 567 *5 and 7 years: Prospective analysis of the UK millennium cohort study*. PloS one,  
7 568 2016. **11**(9): p. e0162339.  
9 569  
10  
11  
12  
13  
14  
15  
16  
17  
18  
19  
20  
21  
22  
23  
24  
25  
26  
27  
28  
29  
30  
31  
32  
33  
34  
35  
36  
37  
38  
39  
40  
41  
42  
43  
44  
45  
46  
47  
48  
49  
50  
51  
52  
53  
54  
55  
56  
57  
58  
59  
60

For peer review only

## COREQ (CONsolidated criteria for REporting Qualitative research) Checklist

A checklist of items that should be included in reports of qualitative research. You must report the page number in your manuscript where you consider each of the items listed in this checklist. If you have not included this information, either revise your manuscript accordingly before submitting or note N/A.

| Topic                                          | Item No. | Guide Questions/Description                                                                                                                              | Reported on Page No. |
|------------------------------------------------|----------|----------------------------------------------------------------------------------------------------------------------------------------------------------|----------------------|
| <b>Domain 1: Research team and reflexivity</b> |          |                                                                                                                                                          |                      |
| <i>Personal characteristics</i>                |          |                                                                                                                                                          |                      |
| Interviewer/facilitator                        | 1        | Which author/s conducted the interview or focus group?                                                                                                   |                      |
| Credentials                                    | 2        | What were the researcher's credentials? E.g. PhD, MD                                                                                                     |                      |
| Occupation                                     | 3        | What was their occupation at the time of the study?                                                                                                      |                      |
| Gender                                         | 4        | Was the researcher male or female?                                                                                                                       |                      |
| Experience and training                        | 5        | What experience or training did the researcher have?                                                                                                     |                      |
| <i>Relationship with participants</i>          |          |                                                                                                                                                          |                      |
| Relationship established                       | 6        | Was a relationship established prior to study commencement?                                                                                              |                      |
| Participant knowledge of the interviewer       | 7        | What did the participants know about the researcher? e.g. personal goals, reasons for doing the research                                                 |                      |
| Interviewer characteristics                    | 8        | What characteristics were reported about the interviewer/facilitator? e.g. Bias, assumptions, reasons and interests in the research topic                |                      |
| <b>Domain 2: Study design</b>                  |          |                                                                                                                                                          |                      |
| <i>Theoretical framework</i>                   |          |                                                                                                                                                          |                      |
| Methodological orientation and Theory          | 9        | What methodological orientation was stated to underpin the study? e.g. grounded theory, discourse analysis, ethnography, phenomenology, content analysis |                      |
| <i>Participant selection</i>                   |          |                                                                                                                                                          |                      |
| Sampling                                       | 10       | How were participants selected? e.g. purposive, convenience, consecutive, snowball                                                                       |                      |
| Method of approach                             | 11       | How were participants approached? e.g. face-to-face, telephone, mail, email                                                                              |                      |
| Sample size                                    | 12       | How many participants were in the study?                                                                                                                 |                      |
| Non-participation                              | 13       | How many people refused to participate or dropped out? Reasons?                                                                                          |                      |
| <i>Setting</i>                                 |          |                                                                                                                                                          |                      |
| Setting of data collection                     | 14       | Where was the data collected? e.g. home, clinic, workplace                                                                                               |                      |
| Presence of non-participants                   | 15       | Was anyone else present besides the participants and researchers?                                                                                        |                      |
| Description of sample                          | 16       | What are the important characteristics of the sample? e.g. demographic data, date                                                                        |                      |
| <i>Data collection</i>                         |          |                                                                                                                                                          |                      |
| Interview guide                                | 17       | Were questions, prompts, guides provided by the authors? Was it pilot tested?                                                                            |                      |
| Repeat interviews                              | 18       | Were repeat interviews carried out? If yes, how many?                                                                                                    |                      |
| Audio/visual recording                         | 19       | Did the research use audio or visual recording to collect the data?                                                                                      |                      |
| Field notes                                    | 20       | Were field notes made during and/or after the interview or focus group?                                                                                  |                      |
| Duration                                       | 21       | What was the duration of the interviews or focus group?                                                                                                  |                      |
| Data saturation                                | 22       | Was data saturation discussed?                                                                                                                           |                      |
| Transcripts returned                           | 23       | Were transcripts returned to participants for comment and/or                                                                                             |                      |

| Topic                                  | Item No. | Guide Questions/Description                                                                                                        | Reported on Page No. |
|----------------------------------------|----------|------------------------------------------------------------------------------------------------------------------------------------|----------------------|
|                                        |          | correction?                                                                                                                        |                      |
| <b>Domain 3: analysis and findings</b> |          |                                                                                                                                    |                      |
| <i>Data analysis</i>                   |          |                                                                                                                                    |                      |
| Number of data coders                  | 24       | How many data coders coded the data?                                                                                               |                      |
| Description of the coding tree         | 25       | Did authors provide a description of the coding tree?                                                                              |                      |
| Derivation of themes                   | 26       | Were themes identified in advance or derived from the data?                                                                        |                      |
| Software                               | 27       | What software, if applicable, was used to manage the data?                                                                         |                      |
| Participant checking                   | 28       | Did participants provide feedback on the findings?                                                                                 |                      |
| <i>Reporting</i>                       |          |                                                                                                                                    |                      |
| Quotations presented                   | 29       | Were participant quotations presented to illustrate the themes/findings?<br>Was each quotation identified? e.g. participant number |                      |
| Data and findings consistent           | 30       | Was there consistency between the data presented and the findings?                                                                 |                      |
| Clarity of major themes                | 31       | Were major themes clearly presented in the findings?                                                                               |                      |
| Clarity of minor themes                | 32       | Is there a description of diverse cases or discussion of minor themes?                                                             |                      |

Developed from: Tong A, Sainsbury P, Craig J. Consolidated criteria for reporting qualitative research (COREQ): a 32-item checklist for interviews and focus groups. *International Journal for Quality in Health Care*. 2007. Volume 19, Number 6: pp. 349 – 357

**Once you have completed this checklist, please save a copy and upload it as part of your submission. DO NOT include this checklist as part of the main manuscript document. It must be uploaded as a separate file.**

# BMJ Open

## **“I also take part in caring for the sick child” - A qualitative study on fathers’ roles and responsibilities in seeking care for children in Southwest Ethiopia**

|                                 |                                                                                                                                                                                                                                                                                                                                          |
|---------------------------------|------------------------------------------------------------------------------------------------------------------------------------------------------------------------------------------------------------------------------------------------------------------------------------------------------------------------------------------|
| Journal:                        | <i>BMJ Open</i>                                                                                                                                                                                                                                                                                                                          |
| Manuscript ID                   | bmjopen-2020-038932.R2                                                                                                                                                                                                                                                                                                                   |
| Article Type:                   | Original research                                                                                                                                                                                                                                                                                                                        |
| Date Submitted by the Author:   | 03-Jul-2020                                                                                                                                                                                                                                                                                                                              |
| Complete List of Authors:       | Funk, Tjede; Karolinska Institute, Global Public Health<br>Källander, Karin; Karolinska Institutet, Department of Global Public Health<br>Abebe, Ayalkibet; Malaria Consortium<br>Alfvén, Tobias ; Karolinska Institute, Department of Global Public Health<br>Alvesson, Helle; Karolinska Institute, Department of Global Public Health |
| <b>Primary Subject Heading</b>: | Global health                                                                                                                                                                                                                                                                                                                            |
| Secondary Subject Heading:      | Global health, Qualitative research                                                                                                                                                                                                                                                                                                      |
| Keywords:                       | Community child health < PAEDIATRICS, QUALITATIVE RESEARCH, PUBLIC HEALTH                                                                                                                                                                                                                                                                |
|                                 |                                                                                                                                                                                                                                                                                                                                          |

SCHOLARONE™  
Manuscripts



I, the Submitting Author has the right to grant and does grant on behalf of all authors of the Work (as defined in the below author licence), an exclusive licence and/or a non-exclusive licence for contributions from authors who are: i) UK Crown employees; ii) where BMJ has agreed a CC-BY licence shall apply, and/or iii) in accordance with the terms applicable for US Federal Government officers or employees acting as part of their official duties; on a worldwide, perpetual, irrevocable, royalty-free basis to BMJ Publishing Group Ltd ("BMJ") its licensees and where the relevant Journal is co-owned by BMJ to the co-owners of the Journal, to publish the Work in this journal and any other BMJ products and to exploit all rights, as set out in our [licence](#).

The Submitting Author accepts and understands that any supply made under these terms is made by BMJ to the Submitting Author unless you are acting as an employee on behalf of your employer or a postgraduate student of an affiliated institution which is paying any applicable article publishing charge ("APC") for Open Access articles. Where the Submitting Author wishes to make the Work available on an Open Access basis (and intends to pay the relevant APC), the terms of reuse of such Open Access shall be governed by a Creative Commons licence – details of these licences and which [Creative Commons](#) licence will apply to this Work are set out in our licence referred to above.

Other than as permitted in any relevant BMJ Author's Self Archiving Policies, I confirm this Work has not been accepted for publication elsewhere, is not being considered for publication elsewhere and does not duplicate material already published. I confirm all authors consent to publication of this Work and authorise the granting of this licence.

1  
2  
3 1 “I also take part in caring for the sick child” - A qualitative study on fathers’ roles  
4  
5  
6 2 and responsibilities in seeking care for children in Southwest Ethiopia  
7  
8  
9  
10 3  
11

12 4 Tjede Funk<sup>1\*</sup>, Karin Källander<sup>1,2,3</sup>, Ayalkibet Abebe<sup>4</sup>, Tobias Alfvén<sup>1,5#</sup>, Helle Mølsted  
13  
14 5 Alvesson<sup>1#</sup>  
15  
16  
17  
18 6  
19  
20

21 7 1 Department of Global Public Health, Karolinska Institute, Stockholm, Sweden

22 8 2 Malaria Consortium, London, United Kingdom

23 9 3 UNICEF, New York, USA

24 10 4 Malaria Consortium, Addis Ababa, Ethiopia

25 11 5 Sachs’ Children and Youth Hospital, Stockholm South General Hospital, Stockholm,  
26 12 Sweden  
27

28 13 # These authors have contributed equally to this work  
29  
30  
31

32 14 \* Corresponding author: Email: [tjede.funk@ki.se](mailto:tjede.funk@ki.se)  
33  
34  
35  
36  
37

38 15 Key words: Fathers, Child, Care-seeking, Ethiopia, Qualitative Research  
39  
40  
41  
42 16  
43  
44  
45  
46  
47  
48  
49  
50  
51  
52  
53  
54  
55  
56  
57  
58  
59  
60

1  
2  
3 18 **ABSTRACT**  
4  
5

6 19 **Objectives:** Fathers play an important role in household decision making processes and child  
7  
8 20 health development. Nevertheless, they are underrepresented in child health research, especially  
9  
10 21 in low-income settings. Little is known about what roles fathers play in the care seeking  
11  
12 22 processes or how they interact with the health system when their child is sick. This study aimed  
13  
14 23 to understand Ethiopian fathers' roles and responsibilities in caring for their children when they  
15  
16 24 are or become ill.  
17  
18  
19

20  
21 25 **Design:** Qualitative study using semi-structured interviews with fathers.  
22  
23

24 26 **Setting:** This study was conducted in three rural districts of the Southern Nations, Nationalities  
25  
26 27 and People's Region of Ethiopia.  
27  
28

29 28 **Participants:** Twenty-four fathers who had at least one child between 2 and 59 months who  
30  
31 29 visited a health extension worker with fever.  
32  
33

34 30 **Results:** The overarching theme was "Changing perceptions of paternal responsibilities during  
35  
36 31 children's ill health". It constituted three sub-themes, namely "Fathers' burden of earning  
37  
38 32 money for care", "Fatherhood entails advocating children's health care needs" and "Investing  
39  
40 33 in children's health can benefit the family in the future". Fathers described that they were the  
41  
42 34 ones mainly responsible for the financial arrangement of care and that this financial  
43  
44 35 responsibility can involve stress when resources are scarce. Fathers knew what health services  
45  
46 36 were available and accessible to them and were involved in different ways in the care-seeking  
47  
48 37 of the child. Changes in the importance ascribed to child health were expressed by fathers who  
49  
50 38 described being more alert to children's ill-health.  
51  
52  
53

54  
55  
56 39 **Conclusion:** Fathers play various roles in the care-seeking process during children's illness  
57  
58 40 episodes. This included for instance arranging resources to seek care, (co-)deciding where to  
59  
60



1  
2  
3 41 seek care as well as accompanying the child to the health facility. The inability to organise  
4  
5 42 necessary resources for care can lead to involuntary delays in care-seeking for the child. This  
6  
7 43 demonstrates the importance of including fathers in future interventions on maternal and child  
8  
9 44 health.

## 10 11 12 13 45 14 15 16 46 **STRENGTH AND LIMITATIONS OF THE STUDY**

- 17  
18  
19 47 • This study distinguishes itself from others by only focusing on fathers and their  
20  
21 48 perceived roles and responsibilities in the care seeking for sick children, which is an  
22  
23 49 underrepresented area in child health research.
- 24  
25  
26 50 • This study used a nested stratified sample and included 24 fathers from highest and  
27  
28 51 lowest socio-economic quintiles and with few (1-2) or many children (3+) in order to  
29  
30 52 provide rich information.
- 31  
32  
33 53 • We sought to mitigate a social desirability bias by having the interviews conducted by  
34  
35 54 male interviewers in two local languages.
- 36  
37  
38 55 • We did not conduct interviews with mothers to confirm the fathers' responses.

## 39 40 41 56 42 43 44 57 **INTRODUCTION**

45  
46  
47 58 Annually approximately 5.3 million children die worldwide before reaching their fifth birthday.  
48  
49 59 Most of these deaths occur following the neonatal period and are caused by diseases such as  
50  
51 60 malaria, pneumonia and diarrhoea [1]. It is further estimated that malnutrition contributes to  
52  
53 61 almost half of child deaths under the age of five and that many of the childhood deaths could  
54  
55 62 have been prevented with simple, effective and available interventions [1]. Nevertheless,  
56  
57 63 caregivers of sick children in poor communities often face obstacles in seeking healthcare, such  
58  
59  
60

64 as lack of money or distance to the care facility [2, 3]. Evidence from Ethiopia shows that only  
65 35% of children with fever and 44% of children with diarrhoea in the previous two weeks were  
66 brought for treatment [4].

67 Decision making processes regarding child health care are complex. Although mothers have  
68 historically been seen as responsible for their children and their health, multiple studies from  
69 low-resource settings show that women, as compared to men, have relatively low decision-  
70 making power when it comes to health care decisions for themselves and their children [5-8].  
71 A study from The Gambia [9] states that mothers decided when to take the child to the hospital  
72 for cerebral malaria in only around 7% of the cases. Other studies confirm that it is mainly the  
73 father who makes the final call on where and when to seek health care [9-11].

74 The important role of fathers in child health and development is becoming better understood  
75 and appreciated. Literature shows that involved fathers are associated with different positive  
76 outcomes, such as knowledge of newborn danger signs among mothers, skilled birth and  
77 attendance of antenatal care visits [12-14]. Some countries have therefore started to address the  
78 involvement of fathers in their road maps to reduce maternal and child morbidity and mortality  
79 [15, 16]. Yet, in low-and middle-income countries only a minority of fathers has been said to  
80 be engaged with their children [17]. Yet different forms of engagement and types of fathers  
81 exist. In a study conducted in Ethiopia, fathers were categorised into three different groups,  
82 depending on their perceptions, practices, and challenges towards routine child care and feeding  
83 [18]: 1) Traditional fathers who “do not feel part of routine child care, and they fully believe  
84 child care is only the mothers’ responsibility”; 2) Transitional fathers who “perceive child care  
85 as being both the mothers’ and fathers’ responsibility”, but under different conditions (e.g.  
86 availability of the father or occupied mother), meaning the father does not completely feel  
87 responsible for child care and 3) Modern fathers who “perceive child care and child feeding as  
88 a shared responsibility between mother and father” and who are totally involved in their child’s

1  
2  
3 89 life. This indicates that not all fathers are alike and that differences in their roles can exist  
4  
5 90 between them.  
6  
7

8 91 A number of studies from Africa have shown that fathers are often the main decision-maker or  
9  
10 92 breadwinner of the family and responsible to pay for healthcare costs [10, 11]. Yet little is  
11  
12 93 known otherwise about what roles they take on in the care seeking process for their children or  
13  
14 94 how fathers interact with the health system when their children are sick. Therefore, this study  
15  
16 95 aims to understand fathers' roles and responsibilities in care-seeking for children in rural areas  
17  
18 96 of the Southern Nations, Nationalities and People's Region in Ethiopia.  
19  
20  
21  
22

23 97

## 24 25 26 98 **MATERIALS AND METHODS**

27  
28  
29 99 The reporting of the methods has been guided by the criteria for reporting qualitative research  
30  
31 100 (COREQ) guidelines [19].  
32  
33

34 101

### 35 36 37 102 **Setting**

38  
39  
40 103 The interviews were conducted in Damot Gale, Boloso Sore and Halaba Special Woreda, three  
41  
42 104 *woredas* (districts) of the Southern Nations, Nationalities and People's Region (SNNPR) of  
43  
44 105 Ethiopia. The population of Ethiopia, similar to these three *woredas*, is predominantly (~80%)  
45  
46 106 living in rural areas. SNNPR is a very ethnically diverse region, inhabited by more than 80  
47  
48 107 different ethnic groups. To improve primary health care services in the country, particular in  
49  
50 108 rural areas, Ethiopia has been implementing a health extension program since 2003 [20].  
51  
52 109 Central to the program are health extension workers (HEW) who are trained for 12-months and  
53  
54 110 subsequently employed by the government to work in health posts directly in and with the  
55  
56 111 community [20, 21]. HEWs are women with at least a grade 10 education. Typically two HEWs  
57  
58  
59  
60

1  
2  
3 112 are assigned to one health post, serving an estimate of 3,000 - 5,000 people [20, 21]. HEW  
4  
5 113 provide key health promotion and prevention services, as well as a selection of curative  
6  
7 114 services; all services are free of charge [21, 22]. Although health posts are placed directly in a  
8  
9  
10 115 community, travel distances can vary from a walking distance of a few minutes to an hour or  
11  
12 116 more [23]. At the time of this study there were 150 health posts in the study area with a total of  
13  
14 117 284 HEW.

15  
16  
17 118 Child mortality rates in Ethiopia have been decreasing over the years and currently stand at 55.2  
18  
19 119 per 1000 live births, with mortality rates in SNNPR higher than the national average [4, 24].  
20  
21 120 Traditional gender roles persist, particularly in rural areas, with a minority of women reporting  
22  
23 121 having the right to decide on their first marriage and having their husband help with household  
24  
25 122 chores. Around 40% use modern contraceptives including sterilisation, contraceptive pills,  
26  
27 123 condoms and implants, and even fewer, less than 30%, give birth in a health facility [4].  
28  
29 124 Twenty-eight per cent of women and 73% of men age 15-49 in the region work within the  
30  
31  
32  
33 125 agricultural sector.

34  
35  
36  
37 126

### 38 39 40 127 **Study design and data collection**

41  
42  
43 128 This qualitative study was nested within a community-based cluster randomised controlled non-  
44  
45 129 inferiority trial (cRCT). The design and results of this trial are published elsewhere, as is the  
46  
47 130 qualitative evaluation of HEW's and caregivers' perception of the recommendations [25-27].

48  
49  
50  
51 131 For this study, twenty-four semi-structured interviews were conducted with fathers who had at  
52  
53 132 least one child aged 2 to 59 months presenting to the HEW with fever. Half of the interviews  
54  
55 133 (n=12) were conducted in Halaba *woreda*, eight in Boloso Sore and four in Damot Gale. Boloso  
56  
57 134 Sore and Damot Gale are culturally and linguistically similar which is why they together  
58  
59  
60 135 represent half of the fathers interviewed.

1  
2  
3 136 The sampling method was based on the assumption that health seeking practices and fathers'  
4  
5 137 decision-making power could differ by socio-economic position and number of children. We  
6  
7 138 therefore used stratified sampling to select half of the fathers from the lowest and the other half  
8  
9  
10 139 from the highest socio-economic quintile. Socio-economic quintiles were based on caregivers'  
11  
12 140 responses to questions about household assets, e.g. material of the house, toilet facility used,  
13  
14 141 availability of TV/radio or electricity in general. It should be kept in mind that a high socio-  
15  
16 142 economic quintile in this study is not equivalent to a high socio-economic status. Fathers in the  
17  
18 143 high socio-economic quintile can still be considered poor. Within the two strata, fathers with  
19  
20 144 few children (1-2) and fathers with multiple children (3 or more) were invited for an interview  
21  
22 145 to maximise the level of heterogeneity among the fathers. However, the information on number  
23  
24 146 of children reported in the cRCT did not always tally with the number of children mentioned  
25  
26 147 by the father during the interview, which is why most fathers (n=19/24) in this study had three  
27  
28 148 or more children. Once the father was randomly selected within each stratum, contact was  
29  
30 149 established through the HEW and fathers were personally visited in their community. When  
31  
32 150 fathers were not at home, contact was established via phone or with help of the HEW in the  
33  
34 151 community. Fathers were asked whether they would be willing to participate in the study. All  
35  
36 152 24 fathers agreed to participate, but two were not able complete the interview due to time  
37  
38 153 constrains.  
39  
40  
41  
42  
43  
44

45 154 An interview guide was developed informed by literature on health care seeking and gender  
46  
47 155 roles. It started with introductory questions about the father and the household to explore  
48  
49 156 fathers' educational background, profession and family composition. While this part was rather  
50  
51 157 structured, the interview guide then followed with open ended questions regarding fathers'  
52  
53 158 practices on the following issues: seeking advice or discussing health matters with other family  
54  
55 159 or community members; fever in children and fathers' understanding of fever; fathers'  
56  
57 160 knowledge on health providers in the community; their decision-making around health services  
58  
59  
60

1  
2  
3 161 and drivers that influenced their seeking health care. The interview ended with asking fathers  
4  
5 162 to compare care-seeking between different households and changes in practices and roles of  
6  
7 163 fathers over time. The interview guide was prepared in English and subsequently translated into  
8  
9  
10 164 Amharic.

11  
12  
13 165 Three male interviewers conducted the interviews, two in Boloso Sore and Damot Gale and one  
14  
15 166 in Halaba. The interviewers were selected based on their experience in qualitative research,  
16  
17 167 English proficiency, and educational background in health sciences. In Halaba, a male  
18  
19 168 interpreter was recruited for translations from Amharic to Halabigna (local language of Halaba)  
20  
21  
22 169 as the interviewer was not familiar with the local language. In Boloso Sore and Damot Gale  
23  
24 170 interviews were conducted in Wolaitegna by two interviewers who were from the district and  
25  
26  
27 171 thus familiar with the area and language. No interviewer met the fathers before the conduction  
28  
29 172 of the interviews.

30  
31  
32 173 All interviewers and the interpreter received a half-day training from authors TF and AA. The  
33  
34 174 training provided insights into the research background, the aim of the study and the sampling  
35  
36 175 of fathers. In addition, the interview procedure was thoroughly explained and the interview  
37  
38 176 guide and all questions were reviewed and discussed in detail. The importance of probing and  
39  
40 177 non-leading questions was emphasized. At the end of the training, any remaining language  
41  
42  
43 178 issues were addressed as the interview guide was prepared in Amharic but the interviews were  
44  
45  
46 179 conducted in the local language. After the training, every interviewer conducted one pilot  
47  
48 180 interview and changes to the interview guide were made accordingly. Based on the pilot  
49  
50 181 interviews, interviewers received oral feedback on how to improve their interviewing and the  
51  
52 182 purpose of certain questions was repeated in order to improve the direction of their probing  
53  
54  
55 183 questions.

184 The interviews were conducted in March 2017 and took between 34 and 70 minutes, with  
 185 interviews using an interpreter taking longer. All interviews were conducted in a quiet place  
 186 outside; the majority took place close to the father's home. Fathers were aged between 20 and  
 187 50 years and the number of children ranged between one and fourteen (see Table 1). In Halaba,  
 188 multiple fathers had two wives. The majority of fathers were farmers.

189 All 24 interviews were digitally recorded, transcribed in Amharic and translated into English.  
 190 The interviewers in Boloso Sore and Damot Gale preferred to transcribe the interviews directly  
 191 in Amharic instead of Wolaitegna, due to the difficulty in writing the local language. After their  
 192 participation in the interview, fathers received 122.5 Birr in cash (~5.5 USD) to compensate for  
 193 their time. This amount equals the common local Malaria Consortium lunch allowance.

194

195

196

197 **Table 1 Characteristics of study participants**

| ID             | Age   | Woreda      | Socio-economic quintile | Reported number of children | Language interview was conducted in* | Length of interview (in min) |
|----------------|-------|-------------|-------------------------|-----------------------------|--------------------------------------|------------------------------|
| 1              | 45-54 | Halaba      | Highest                 | 11                          | Halabigna                            | 50                           |
| 2 <sup>±</sup> | 35-44 | Halaba      | Lowest                  | 8                           | Halabigna                            | 40                           |
| 3              | 45-54 | Boloso Sore | Highest                 | 12                          | Wolaitegna                           | 59                           |
| 4              | 45-54 | Boloso Sore | Lowest                  | 7                           | Wolaitegna                           | 60                           |
| 5              | 25-34 | Boloso Sore | Lowest                  | 6                           | Wolaitegna                           | 39                           |
| 6              | 35-44 | Damot Gale  | Highest                 | 8                           | Wolaitegna                           | 52                           |
| 7              | 25-34 | Halaba      | Lowest                  | 2                           | Halabigna                            | 61                           |
| 8              | 35-44 | Damot Gale  | Lowest                  | 9                           | Wolaitegna                           | 51                           |
| 9              | 35-44 | Halaba      | Lowest                  | 12                          | Halabigna                            | 55                           |
| 10             | 25-34 | Boloso Sore | Highest                 | 4                           | Wolaitegna                           | 49                           |

|                 |       |             |         |    |            |    |
|-----------------|-------|-------------|---------|----|------------|----|
| 11              | 45-54 | Boloso Sore | Lowest  | 7  | Wolaitegna | 49 |
| 12 <sup>±</sup> | 35-44 | Halaba      | Lowest  | 14 | Halabigna  | 40 |
| 13              | 25-34 | Halaba      | Highest | 3  | Halabigna  | 64 |
| 14              | < 25  | Boloso Sore | Lowest  | 1  | Wolaitegna | 46 |
| 15              | < 25  | Boloso Sore | Lowest  | 1  | Wolaitegna | 51 |
| 16              | 35-44 | Halaba      | Highest | 8  | Halabigna  | 70 |
| 17              | 35-44 | Damot Gale  | Highest | 3  | Wolaitegna | 51 |
| 18              | 35-44 | Damot Gale  | Highest | 7  | Wolaitegna | 46 |
| 19              | 35-44 | Halaba      | Highest | 6  | Halabigna  | 40 |
| 20              | 45-54 | Halaba      | Highest | 3  | Halabigna  | 50 |
| 21              | 25-34 | Halaba      | Highest | 9  | Halabigna  | 45 |
| 22              | N/A   | Boloso Sore | Highest | 2  | Wolaitegna | 34 |
| 23              | 35-44 | Halaba      | Lowest  | 5  | Halabigna  | 45 |
| 24              | 25-34 | Halaba      | Lowest  | 2  | Halabigna  | 50 |

198

*\*Interviews in Halaba were conducted using an interpreter (from Halabigna to Amharic)*

*±Interview was not completed*

## 200 Ethical approval

201 This study was nested within a cRCT that was approved by the SNNPR Health Bureau Research  
 202 Ethical Review Committee (P02-6-19/4511). The trial is registered as NCT02926625. Written  
 203 and oral consent was obtained from all study participants. Confidentiality was ensured and the  
 204 aim of the study was explained to the fathers prior to the interview. They were informed about  
 205 the option to decline participation or drop out of the interview without any consequences.

## 206 Patient and public involvement

207 There was no involvement of patients/interviewees or the public in setting the research agenda  
 208 or formulating interview guides.

209



## 210 **Data analysis**

211 All 24 father interviews were included in the analysis, although two fathers did not complete  
212 the interview. As these two fathers did answer a number of questions, it was seen as appropriate  
213 to include the material provided by them in the analysis, even though it was not fully completed.  
214 The transcripts were read multiple times and codes to the material were applied using the  
215 qualitative data structuring software Nvivo version 11. Interviews were analysed using content  
216 analysis [28]. The analysis was an iterative process involving reading of literature and repeated  
217 reading of interview transcripts. The coding process was done in steps. TF conducted the initial  
218 coding and discussions took place with HMA. After each meeting, changes to the codes were  
219 made. Finally, codes were grouped, and themes identified, which were again discussed between  
220 authors TF and HMA. All father interviews were analysed together, meaning that no  
221 stratification by socio-economic quintiles and number of children of fathers (strata used for the  
222 sample selection) took place for the analysis. However, after the coding of the data was done,  
223 it was checked whether fathers from different strata were represented in each theme.

224

225

## 226 **RESULTS**

227 Three sub-themes emerged from the data: 1) Fathers' burden of earning money for care, 2)  
228 Fatherhood entails advocating children's health care needs, and 3) Investing in children's health  
229 can benefit the family in the future. The results are presented according to these themes and fed  
230 into the overarching theme of "Changing perceptions of paternal responsibilities during  
231 children's ill health".

232

1  
2  
3 233 **Fathers' burden of earning money for care**  
4  
5

6 234 Fathers described their roles and responsibilities in care-seeking for children mostly in terms of  
7  
8 235 financial responsibilities. They explained that their main role as father was to work and earn  
9  
10 236 money to be able to finance health care costs and, when necessary, transportation to the facility.  
11  
12  
13 237 Fathers felt strongly that “*money matters*” when it comes to seeking care for children.  
14  
15 238 Nevertheless, it was explained that they often did not have the necessary resources at hand to  
16  
17 239 finance health care costs. This was expressed by fathers from both socio-economic strata,  
18  
19 240 lowest and highest socio-economic quintile. Most fathers interviewed mentioned that health  
20  
21 241 care costs are financed through work or selling goods, animals or land. When not enough money  
22  
23 242 could be arranged, fathers would make other arrangements, such as borrowing money to pay  
24  
25 243 for health care costs. Fathers would either borrow money through *idir* [a financial community  
26  
27 244 support system where members can regularly contribute small amounts of money and in return  
28  
29 245 are able to borrow some money in case of need] or from family and friends. Mothers were often,  
30  
31 246 but not always, described as not having their own income source that could contribute to health  
32  
33 247 care expenses. Furthermore, mothers generally were described as having difficulties in  
34  
35 248 borrowing money as even though they would try to obtain a loan, they would often not receive  
36  
37 249 one [from *idir*]. Consequently, the burden on arranging resources for treatment was, according  
38  
39 250 to the fathers, mainly placed on them. The financial stress that fathers experience was described  
40  
41 251 by this father:  
42  
43  
44  
45  
46  
47

48 252 *We have idir where we save some amount of money regularly. I have to pay back the money*  
49  
50 253 *within 10 to 15 days. In case they don't allow me [to borrow money] due to some*  
51  
52 254 *inconveniences, I borrow from friends, relatives, particularly from my grandmother. But the*  
53  
54 255 *reality is that I borrow again before I paid back the first loan. (ID 8; lowest socio-economic*  
55  
56 256 *quintile; 3+ children)*  
57  
58  
59  
60

1  
2  
3 257 One father also emphasised that it was easier for fathers with a better financial situation to  
4  
5 258 borrow money compared to fathers with few resources, which further emphasised the financial  
6  
7 259 worries that fathers were faced with.  
8  
9

10  
11 260 *The father with better financial resources can take his children to health providers easily. Even*  
12  
13 261 *if he doesn't have the money, he can borrow it easily because people believe that he can pay it*  
14  
15 262 *back. But if the poor wants to borrow money from friends or other people, people are not happy*  
16  
17 263 *to give him [money] because they are wondering 'from where is he going to pay me back?' (ID*  
18  
19 264 *4; lowest socio-economic quintile; 3+ children)*  
20  
21  
22

23 265 In addition, fathers also mentioned that care-seeking for their child can be delayed if they have  
24  
25 266 no money at hand, and sometimes it could take several days to find the necessary resources to  
26  
27 267 finance health care costs. Consequently, it was expressed that even if a father wanted to seek  
28  
29 268 care immediately, this was not always possible. Fathers from both socio-economic strata  
30  
31 269 mentioned such financial worries and constraints.  
32  
33  
34

35 270 *[...] if we go to [name of] hospital, we may pay up to 1000 birr (~36 USD). Even if we only*  
36  
37 271 *stay one night there, they charge us 700 up to 800 birr (~25-30 USD). The more we stay there,*  
38  
39 272 *the more money we are expected to pay. If we don't have money, we are left with staying home*  
40  
41 273 *with the sick child and praying to God. (ID 15; lowest socio-economic quintile; 3+ children)*  
42  
43  
44

45 274  
46  
47

### 48 275 **Fatherhood entails advocating children's health care needs**

49  
50  
51 276 Fathers were well aware of the different health services available to their children, whether it  
52  
53 277 was the health post, health centre, private or traditional providers. They stated that they  
54  
55 278 discussed with their wives on what actions to take and where to take the child when it is sick.  
56  
57  
58  
59  
60

1  
2  
3 279 However, many of them still saw themselves as the ultimate decision maker whose suggestion  
4  
5 280 will be followed.  
6  
7

8  
9 281 *Since I bear more responsibility as father on my family's affairs, it is my decision that needs to*  
10  
11 282 *be adhered to. Since she [wife] doesn't have an income generating work and we solely depend*  
12  
13 283 *on the income I get, it is me who decides over issues. (ID 15; lowest socio-economic quintile;*  
14  
15 284 *3+ children)*  
16  
17

18  
19 285 Different factors can influence the choice as to which provider a child is taken. The type of  
20  
21 286 illness the child has can be such a factor. When the child was suspected of having a bone fracture  
22  
23 287 or a dislocation, multiple fathers explained that traditional healers also referred to as "*bone*  
24  
25 288 *setter*" are the first choice of treatment. If the traditional treatment is not effective, other sources  
26  
27 289 of treatment will be sought. For other types of illnesses, a father would directly take the child  
28  
29 290 to a different health provider, such as the health post.  
30  
31  
32

33 291 Money was also explained to be a decisive factor in the care-seeking process. According to  
34  
35 292 fathers the availability of money and resources provides a freedom in choosing a health provider  
36  
37 293 for the child's health condition. This freedom is constrained if resources are scarce.  
38  
39  
40

41 294 *Rich [people] take sick children directly to hospital. But since poor [people] have no money,*  
42  
43 295 *they take [the child] to the health post. They only take [the child] to the hospital when its*  
44  
45 296 *condition is life threatening. (ID 8)*  
46  
47

48  
49 297 Multiple fathers seemed to prefer the health centre over the health post, because more and better  
50  
51 298 treatment was believed to be available there. It was stressed that the general perception is that  
52  
53 299 treatment was better in urban areas and also faster at private providers, though private providers  
54  
55 300 were expensive and described as business-oriented. Nevertheless, if the money was available,  
56  
57 301 some fathers still preferred private services over public facilities. Fathers observed a formal  
58  
59 302 care chain (or "*hierarchy*") in health care. They described that health centres expected them to  
60

1  
2  
3 303 have a referral slip from the health post, making it harder for them to directly access treatment  
4  
5 304 at the health centre. This was seen as an obstacle in seeking care.  
6  
7

8 305 The responsibility for bringing or accompanying a sick child for treatment was unclear.  
9  
10 306 Bringing the child to a health post for treatment was first seen as being a responsibility of the  
11  
12 307 mother. Mothers were described to be responsible for bringing the children who were breastfed  
13  
14 308 to the health provider, whereas fathers claimed to rather accompany older children that could  
15  
16 309 walk or sit on a motorcycle to the health provider. Whether or not a father brought or  
17  
18 310 accompanied a child to a health facility also depended on the health facility in question. One  
19  
20 311 father explained that the mother sought care at the health post alone, but fathers needed to be  
21  
22 312 consulted to seek care at the health centre or higher-level facilities, often implying more severe  
23  
24 313 illnesses and higher costs.  
25  
26  
27  
28  
29

30 314 *When the mother notices that the child is sick, she takes her [the child] to health post. If the*  
31  
32 315 *health post advises her [the mother] to take the child to the health centre [i.e. refers the child*  
33  
34 316 *as the health problem is not identified or manageable at community level], she returns back*  
35  
36 317 *and waits for my return. After I return back to home, we together take the child to the health*  
37  
38 318 *centre together. (ID 15; lowest socio-economic quintile; 3+ children)*  
39  
40  
41

42 319 If the child needed to stay at the hospital, a father described it as his role to stay with the child.  
43  
44 320 In addition, the arrangement of the transportation to the health facility was, according to some  
45  
46 321 fathers, also their role.  
47  
48  
49

## 50 322 **Investing in children's health can benefit the family in the future**

51  
52  
53 323 Behaviours of fathers with regards to seeking care for children has changed over time. It was  
54  
55 324 explained that fathers today are more involved in child health matters compared to the past and  
56  
57 325 that they do not leave this issue entirely up to the mothers anymore. Fathers stated being more  
58  
59 326 alert about changes in health status of their children and that they will not rely only on faith to  
60

1  
2  
3 327 cure the child.  
4  
5

6 328 *I can say that the love I have to my children is stronger than the mother's love. Due to that*  
7  
8 329 *reason, I also closely follow their [the children's] health situation. (ID 4; lowest socio-*  
9  
10 330 *economic quintile; 3+ children)*  
11  
12

13  
14 331 A couple of fathers pointed out the value that children have and can bring in the future, for  
15  
16 332 instance through working and supporting the family financially. Consequently, fathers stated  
17  
18 333 they paid more attention to their child's health status and made sure that they recovered.  
19  
20

21 334 *In past time, there were widely held assumptions among fathers that a child will grow by his*  
22  
23 335 *fate so that no worries are needed. But this belief is changing as those sons and daughters that*  
24  
25 336 *work at urban centres and abroad send [money] and augment their family's income. Children*  
26  
27 337 *now are believed to be assets and obtain great care. So fathers are alert whenever they observe*  
28  
29 338 *changes in their children's health. (ID 18; highest socio-economic quintile; 3+ children)*  
30  
31  
32

33  
34 339 Fathers also observed changes in the health services over time. They noticed that health posts  
35  
36 340 that are now existing in their community were not available in the past.  
37  
38

39 341

40 342

## 41 343 **DISCUSSION**

42  
43  
44  
45  
46  
47 344 This study indicates that fathers are involved in the care-seeking of their sick child in different  
48  
49 345 ways. This includes bearing the main responsibility for arranging financial resources to enable  
50  
51 346 a health care visit and this responsibility can imply stress and financial concerns when resources  
52  
53 347 are scarce. Fathers are well aware of the health services available to their children and they  
54  
55 348 described being involved in the care-seeking process in different ways, e.g. (co-)deciding where  
56  
57 349 to take the child or accompanying their child to the health facility. Fathers explained that  
58  
59  
60

1  
2  
3 350 changes in fathers' perception on children and their involvement have taken place. They  
4  
5 351 described themselves being more aware of the health status of their children and more involved  
6  
7 352 in child health matters compared to the past.  
8  
9

10  
11 353 This transitional change in fathers' perceptions of their children has been described in another  
12  
13 354 study conducted in Ethiopia [29]. Multiple fathers interviewed in this study would fit into the  
14  
15 355 "transitional fathers" category. According to them, child health issues are not seen as only a  
16  
17 356 task of the mother anymore. It seems as if these fathers acknowledge these responsibilities as  
18  
19 357 being part of their role as father. The findings of this study show that not all fathers take on the  
20  
21 358 same roles in care-seeking for children. This suggests that roles in these rural areas are changing  
22  
23 359 and that with continuous country efforts, fathers' roles as caregiver could be strengthened.  
24  
25  
26

27  
28 360 Also, the phrasing of the last theme "Investing in children's health can benefit family in the  
29  
30 361 future" seems very timely, considering that a recently published report by the WHO-UNICEF-  
31  
32 362 Lancet Commission highlights the importance and benefits of investing in children [30]. It is  
33  
34 363 noteworthy that fathers did not only observe changes in paternal behaviour, but also appreciated  
35  
36 364 changes in the availability of health services, e.g. the establishment of a health post in their  
37  
38 365 community.  
39  
40  
41

42  
43 366 The responsibility of fathers for household finances and financing of care have been described  
44  
45 367 in multiple previous studies [10, 11, 31-33]. This study coincided with these findings, but also  
46  
47 368 shed light on the burden that this responsibility brings when a child is ill. The reality described  
48  
49 369 by fathers was that often resources were not available to finance health care costs, and that in  
50  
51 370 many cases fathers needed to borrow money again before having paid back their first debt. It  
52  
53 371 appears to be a vicious circle in which particularly very poor fathers are placed, and  
54  
55 372 demonstrates the difficult situations that these families go through in times of sickness. It is  
56  
57 373 important to stress that both groups of fathers (highest and lowest socio-economic quintile)  
58  
59  
60

1  
2  
3 374 expressed concerns in arranging resources and money and would compare themselves with  
4  
5 375 better-off fathers. The comparisons expressed by these fathers therefore do not refer to a  
6  
7 376 comparison between the two socio-economic quintile groups in this study.  
8  
9

10  
11 377 The inability to arrange money to pay for health care costs can lead to involuntary delays in  
12  
13 378 care-seeking. The link between costs and delayed health care has been previously described in  
14  
15 379 the literature [34, 35]. These findings suggest that besides educating parents on danger signs  
16  
17 380 and when to seek care, it is very important to have health care infrastructure in place and health  
18  
19 381 facilities accessible to the communities. The Sustainable Development Goal 3.8 touches upon  
20  
21 382 this as it aims to “achieve universal health coverage, including financial risk protection [and]  
22  
23 383 access to quality essential health-care services (...)” [36]. In order to further improve maternal  
24  
25 384 and child health, health services should be made accessible to all, both physically and  
26  
27 385 economically [37].  
28  
29  
30

31  
32 386 In this study multiple fathers stated that they discuss and decide together with their wives on  
33  
34 387 what to do when their child is sick. Nevertheless, many of these fathers still saw themselves as  
35  
36 388 final decision-makers whose opinions should be adhered to. Literature supports that fathers  
37  
38 389 often are the decision-maker of the household [9, 11], which raises questions on the true  
39  
40 390 influence of mothers’ opinions on the decision-making processes. It is known that fathers play  
41  
42 391 an important role in a children’s development. Positive involvement of fathers can impact not  
43  
44 392 only children’s cognitive skills, but also their social competences and behavioural or emotional  
45  
46 393 outcomes [38-40]. This shows, together with fathers’ important role as decision-maker and  
47  
48 394 breadwinner in the care-seeking process, that there is a strong need for including fathers in  
49  
50 395 future interventions aimed at improving maternal and child health. It is thereby crucial to  
51  
52 396 consider that many fathers spend much of their time away from home because of their work.  
53  
54 397 Interventions need to be formulated accordingly.  
55  
56  
57  
58  
59  
60



1  
2  
3 398 Another interesting finding of this study was that fathers were not only involved in household  
4  
5 399 decision-making and finances, but were also directly in contact with the health system for their  
6  
7 400 children. Fathers were not only well aware of the different health providers available or  
8  
9 401 accessible to them, but also described bringing the child to the health facility or accompanying  
10  
11 402 the mother. We did not come across a study that discussed similar findings.  
12  
13  
14

### 15 403 **STRENGTHS AND WEAKNESSES**

16  
17  
18 404 This study focussed on fathers of both low and high socioeconomic quintiles in order to  
19  
20 405 contribute to current literature as fathers remain underrepresented in child health research. We  
21  
22 406 conducted interviews in the local language in Boloso Sore and Damot Gale but in Halaba we  
23  
24 407 overcame language diversity through use of a local interpreter. Two interviews in Halaba were  
25  
26 408 not finalised due to other obligations of the father. As these selected fathers have not been  
27  
28 409 replaced, some information was lost. However, due to the large number of interviews conducted  
29  
30 410 we have obtained sufficient information. Multiple findings of this study coincided with previous  
31  
32 411 literature. We thus assume that these findings are transferable to communities with similar  
33  
34 412 family structures and cultural contexts and health systems. Furthermore, a social desirability  
35  
36 413 bias (e.g. father claiming to be more involved in the care-seeking process than they actually  
37  
38 414 are) cannot be excluded with certainty in this study. Also, we did not conduct interviews with  
39  
40 415 mothers to check or confirm fathers' responses. Nevertheless, we aimed to mitigate the chances  
41  
42 416 of a desirability bias by using male interviewers. We therefore believe that the information  
43  
44 417 provided does reflect their roles and perceptions well.  
45  
46  
47  
48  
49  
50

51 418

### 52 53 419 **CONCLUSIONS**

54  
55  
56 420 Fathers play an important role in the care-seeking process of their children. Not only do they  
57  
58 421 have decision-making power and the financial responsibility, but they are also otherwise  
59  
60

1  
2  
3 422 involved in the care-seeking process, such as arranging transportation or accompanying the  
4  
5 423 child at times to the facility. Fathers are familiar with the health services available to their  
6  
7 424 children and even noticed positive changes in the paternal involvement in childcare, as well as  
8  
9 425 availability of health services through the establishment of health posts in their communities.  
10  
11 426 Efforts need to be made to continue the observed positive trend in fathers' involvement in care  
12  
13 427 seeking described in this study. Future research on maternal and child health needs continue  
14  
15 428 considering and highlighting fathers' roles and responsibilities. The inability to organise  
16  
17 429 necessary resources for care can lead to involuntary delays in care-seeking for the child. It is  
18  
19 430 therefore crucial to continue strengthening health care systems and making health services more  
20  
21 431 accessible to communities, both physically and financially.  
22  
23  
24  
25  
26  
27 432  
28

### 29 433 **ACKNOWLEDGEMENTS**

30  
31  
32 434 We thank the Federal Ministry of Health in Ethiopia, the Regional Health Bureau in  
33  
34 435 SNNPR (in particular, our technical advisor, Dr. Habtamu Beyene), and the woreda offices in  
35  
36 436 Damot Gale, Boloso Sore and Halaba. We extend our thanks to all fathers we interviewed for  
37  
38 437 granting us their time and being willing to share their experiences. Finally, we would like to  
39  
40 438 acknowledge Tesfahun Tadesse, Muluken Tamirat, Tessema Awano for conducting the  
41  
42 439 interviews and Ahmedin Alemu for functioning as interpreter.  
43  
44  
45  
46  
47 440  
48  
49 441  
50

### 51 442 **FUNDING STATEMENT**

52  
53  
54  
55 443 This work was part of the Translating Research into Action (TRAction) and funded by the  
56  
57 444 President's Malaria Initiative and United States Agency for International Development  
58  
59 445 (USAID) under cooperative agreement No.GHS-A-00-09-00015-00.  
60

1  
2  
3 446  
4  
56 447 **COMPETING INTEREST**  
7  
89 448 The authors declare that they have no competing interest.  
10  
1112 449  
13  
1415 450 **AUTHORS' CONTRIBUTION**  
16  
17

18 451 All authors were involved in conceiving and designing the study. TF, KK, TA and HMA  
19 452 developed the study plan and formulated the interview guide. TF and AA were training the  
20 453 interviewers and following the interview process. TF and HMA analysed the interviews. TF  
21 454 wrote the paper together with all other authors. All authors read and approved the final version  
22 455 of this paper.

23 456  
24  
25  
26  
27  
28  
29  
30  
31  
32  
3334 457 **DATA SHARING STATEMENT**  
35  
36

37 458 All relevant data for this study are included in this paper. To protect the anonymity of our  
38 459 respondents, full transcripts will not be provided.

39 460  
40  
41  
42  
43  
44  
45  
46  
47  
48  
49  
50  
5152 461  
53  
5455 462  
56  
57  
58  
59  
6061 463 **REFERENCES**  
62  
63

- 64 464 1. World Health Organization. *Children: reducing mortality*. 2019 [cited 05 May 2020;  
65 465 Available from: [https://www.who.int/news-room/fact-sheets/detail/children-reducing-](https://www.who.int/news-room/fact-sheets/detail/children-reducing-mortality)  
66 466 [mortality](https://www.who.int/news-room/fact-sheets/detail/children-reducing-mortality).
- 67 467 2. Schellenberg, J.A., et al., *Inequities among the very poor: health care for children in*  
68 468 *rural southern Tanzania*. The Lancet, 2003. **361**(9357): p. 561-566.

- 3 469 3. Lama, T.P., et al., *Illness recognition, decision-making, and care-seeking for maternal*  
4 470 *and newborn complications: a qualitative study in Sarlahi District, Nepal*. Journal of  
5 471 Health, Population and Nutrition, 2017. **36**(1): p. 45.
- 6 472 4. Central Statistical Agency (CSA) [Ethiopia], ICF, and *Ethiopia Demographic and*  
7 473 *Health Survey 2016*. 2016, CSA and ICF.: Addis Ababa, Ethiopia, and Rockville,  
8 474 Maryland, USA.
- 9 475 5. Fantahun, M., et al., *Women's involvement in household decision-making and*  
10 476 *strengthening social capital—crucial factors for child survival in Ethiopia*. Acta  
11 477 paediatrica, 2007. **96**(4): p. 582-589.
- 12 478 6. Senarath, U. and N.S. Gunawardena, *Women's autonomy in decision making for health*  
13 479 *care in South Asia*. Asia Pacific Journal of Public Health, 2009. **21**(2): p. 137-143.
- 14 480 7. Alemayehu, M. and M. Meskele, *Health care decision making autonomy of women*  
15 481 *from rural districts of Southern Ethiopia: a community based cross-sectional study*.  
16 482 International journal of women's health, 2017. **9**: p. 213.
- 17 483 8. Osamor, P.E. and C. Grady, *Women's autonomy in health care decision-making in*  
18 484 *developing countries: a synthesis of the literature*. International journal of women's  
19 485 health, 2016. **8**: p. 191.
- 20 486 9. Okoko, B.J. and L.K. Yamuah, *Household decision-making process and childhood*  
21 487 *cerebral malaria in The Gambia*. Archives of medical research, 2006. **37**(3): p. 399-  
22 488 402.
- 23 489 10. Abubakar, A., et al., *Socio-cultural determinants of health-seeking behaviour on the*  
24 490 *Kenyan coast: a qualitative study*. PloS one, 2013. **8**(11): p. e71998.
- 25 491 11. Ellis, A.A., et al., *Household roles and care-seeking behaviours in response to severe*  
26 492 *childhood illness in Mali*. Journal of Biosocial Science, 2013. **45**(6): p. 743-759.
- 27 493 12. Zaman, S.B., et al., *Husband's involvement with mother's awareness and knowledge*  
28 494 *of newborn danger signs in facility-based childbirth settings: a cross-sectional study*  
29 495 *from rural Bangladesh*. BMC research notes, 2018. **11**(1): p. 286.
- 30 496 13. Mangeni, J.N., et al., *Male involvement in maternal healthcare as a determinant of*  
31 497 *utilisation of skilled birth attendants in Kenya*. East African medical journal, 2012.  
32 498 **89**(11): p. 372-383.
- 33 499 14. Yargawa, J. and J. Leonardi-Bee, *Male involvement and maternal health outcomes:*  
34 500 *systematic review and meta-analysis*. J Epidemiol Community Health, 2015: p. jech-  
35 501 2014-204784.
- 36 502 15. Malawi Ministry of Health, *Road Map for Accelerating the reduction of Maternal and*  
37 503 *Neonatal Morbidity and Mortality in Malawi*. 2012.
- 38 504 16. Tanzania Ministry of Health, et al., *The National Road Map Strategic Plan to improve*  
39 505 *reproductive, maternal, newborn, child & adolescent health in Tanzania (2016-2020)*.  
40 506 2016: Dar es Salaam.
- 41 507 17. Jeong, J., et al., *Paternal stimulation and early child development in low-and middle-*  
42 508 *income countries*. Pediatrics, 2016. **138**(4): p. e20161357.
- 43 509 18. Bilal, S., et al., *Fathers' Perception, Practice, and Challenges in Young Child Care*  
44 510 *and Feeding in Ethiopia*. Food and nutrition bulletin, 2016. **37**(3): p. 329-339.
- 45 511 19. Tong, A., P. Sainsbury, and J. Craig, *Consolidated criteria for reporting qualitative*  
46 512 *research (COREQ): a 32-item checklist for interviews and focus groups*. International  
47 513 journal for quality in health care, 2007. **19**(6): p. 349-357.
- 48 514 20. Assefa, Y., et al., *Community health extension program of Ethiopia, 2003–2018:*  
49 515 *successes and challenges toward universal coverage for primary healthcare services*.  
50 516 Globalization and health, 2019. **15**(1): p. 24.

- 1  
2  
3 517 21. Legesse, H., et al., *National scale-up of integrated community case management in*  
4 518 *rural Ethiopia: Implementation and early lessons learned*. Ethiop Med J, 2014. **52**: p.  
5 519 15-26.  
6 520 22. Wang, H., et al., *Ethiopia health extension program: an institutionalized community*  
7 521 *approach for universal health coverage*. 2016: The World Bank.  
8 522 23. Okwaraji, Y.B., et al., *The association between travel time to health facilities and*  
9 523 *childhood vaccine coverage in rural Ethiopia. A community based cross sectional*  
10 524 *study*. BMC public health, 2012. **12**(1): p. 476.  
11 525 24. UNICEF. *Country profiles: Ethiopia*. 201 [cited 2020 25 May]; Available from:  
12 526 <https://data.unicef.org/country/eth/>.  
13 527 25. Källander, K., et al., *Universal versus conditional day 3 follow-up for children with*  
14 528 *non-severe unclassified fever at the community level in Ethiopia: A cluster-*  
15 529 *randomised non-inferiority trial*. PLoS medicine, 2018. **15**(4): p. e1002553-e1002553.  
16 530 26. Källander, K., et al., *Universal versus conditional third day follow-up visit for*  
17 531 *children with nonsevere unclassified fever at the community level in Ethiopia:*  
18 532 *Protocol for a cluster randomized noninferiority trial*. JMIR research protocols, 2018.  
19 533 **7**(4): p. e99-e99.  
20 534 27. Funk, T., et al., *Management and follow-up practices of children with unclassified*  
21 535 *fever in rural Ethiopia: experiences of health extension workers and caregivers*. The  
22 536 *American journal of tropical medicine and hygiene*, 2018. **99**(5): p. 1255-1261.  
23 537 28. Elo, S. and H. Kyngäs, *The qualitative content analysis process*. Journal of Advanced  
24 538 *Nursing*, 2008. **62**(1): p. 107-115.  
25 539 29. Bilal, S., *The fathers' role in child nutrition in Ethiopia*. 2015: Maastricht University.  
26 540 30. Clark, H., et al., *A future for the world's children? A WHO–UNICEF–Lancet*  
27 541 *Commission*. The Lancet, 2020. **395**(10224): p. 605-658.  
28 542 31. Ewing, V.L., et al., *Increasing understanding of the relationship between geographic*  
29 543 *access and gendered decision-making power for treatment-seeking for febrile children*  
30 544 *in the Chikwawa district of Malawi*. Malaria journal, 2016. **15**(1): p. 521.  
31 545 32. Montgomery, C.M., et al., *'To help them is to educate them': power and pedagogy in*  
32 546 *the prevention and treatment of malaria in Tanzania*. Tropical Medicine &  
33 547 *International Health*, 2006. **11**(11): p. 1661-1669.  
34 548 33. Tolhurst, R. and F.K. Nyongator, *Looking within the household: gender roles and*  
35 549 *responses to malaria in Ghana*. Transactions of the Royal Society of Tropical  
36 550 *Medicine and Hygiene*, 2006. **100**(4): p. 321-326.  
37 551 34. Getahun, A., K. Deribe, and A. Deribew, *Determinants of delay in malaria treatment-*  
38 552 *seeking behaviour for under-five children in south-west Ethiopia: a case control study*.  
39 553 *Malaria Journal*, 2010. **9**(1): p. 320.  
40 554 35. Hildenwall, H., et al., *"I never had the money for blood testing"—Caretakers'*  
41 555 *experiences of care-seeking for fatal childhood fevers in rural Uganda—a mixed*  
42 556 *methods study*. BMC international health and human rights, 2008. **8**(1): p. 12.  
43 557 36. United Nations. *Sustainable Development Goals*. [cited 2019 14 January ]; Available  
44 558 from: <https://sustainabledevelopment.un.org/>.  
45 559 37. Tanou, M. and Y. Kamiya, *Assessing the impact of geographical access to health*  
46 560 *facilities on maternal healthcare utilization: evidence from the Burkina Faso*  
47 561 *demographic and health survey 2010*. BMC Public Health, 2019. **19**(1): p. 838.  
48 562 38. Rollè, L., et al., *Father Involvement and Cognitive Development in Early and Middle*  
49 563 *Childhood: A Systematic Review*. Frontiers in psychology, 2019. **10**: p. 2405.  
50 564 39. Torres, N., et al., *Domains of father involvement, social competence and problem*  
51 565 *behavior in preschool children*. Journal of Family Studies, 2014. **20**(3): p. 188-203.  
52  
53  
54  
55  
56  
57  
58  
59  
60

1  
2  
3  
4  
5  
6  
7  
8  
9  
10  
11  
12  
13  
14  
15  
16  
17  
18  
19  
20  
21  
22  
23  
24  
25  
26  
27  
28  
29  
30  
31  
32  
33  
34  
35  
36  
37  
38  
39  
40  
41  
42  
43  
44  
45  
46  
47  
48  
49  
50  
51  
52  
53  
54  
55  
56  
57  
58  
59  
60

566 40. Kroll, M.E., et al., *Early father involvement and subsequent child behaviour at ages 3,*  
567 *5 and 7 years: Prospective analysis of the UK millennium cohort study.* PloS one,  
568 2016. **11**(9): p. e0162339.

569

For peer review only



## COREQ (CONsolidated criteria for REporting Qualitative research) Checklist

A checklist of items that should be included in reports of qualitative research. You must report the page number in your manuscript where you consider each of the items listed in this checklist. If you have not included this information, either revise your manuscript accordingly before submitting or note N/A.

| Topic                                          | Item No. | Guide Questions/Description                                                                                                                              | Reported on Page No. |
|------------------------------------------------|----------|----------------------------------------------------------------------------------------------------------------------------------------------------------|----------------------|
| <b>Domain 1: Research team and reflexivity</b> |          |                                                                                                                                                          |                      |
| <i>Personal characteristics</i>                |          |                                                                                                                                                          |                      |
| Interviewer/facilitator                        | 1        | Which author/s conducted the interview or focus group?                                                                                                   |                      |
| Credentials                                    | 2        | What were the researcher's credentials? E.g. PhD, MD                                                                                                     |                      |
| Occupation                                     | 3        | What was their occupation at the time of the study?                                                                                                      |                      |
| Gender                                         | 4        | Was the researcher male or female?                                                                                                                       |                      |
| Experience and training                        | 5        | What experience or training did the researcher have?                                                                                                     |                      |
| <i>Relationship with participants</i>          |          |                                                                                                                                                          |                      |
| Relationship established                       | 6        | Was a relationship established prior to study commencement?                                                                                              |                      |
| Participant knowledge of the interviewer       | 7        | What did the participants know about the researcher? e.g. personal goals, reasons for doing the research                                                 |                      |
| Interviewer characteristics                    | 8        | What characteristics were reported about the interviewer/facilitator? e.g. Bias, assumptions, reasons and interests in the research topic                |                      |
| <b>Domain 2: Study design</b>                  |          |                                                                                                                                                          |                      |
| <i>Theoretical framework</i>                   |          |                                                                                                                                                          |                      |
| Methodological orientation and Theory          | 9        | What methodological orientation was stated to underpin the study? e.g. grounded theory, discourse analysis, ethnography, phenomenology, content analysis |                      |
| <i>Participant selection</i>                   |          |                                                                                                                                                          |                      |
| Sampling                                       | 10       | How were participants selected? e.g. purposive, convenience, consecutive, snowball                                                                       |                      |
| Method of approach                             | 11       | How were participants approached? e.g. face-to-face, telephone, mail, email                                                                              |                      |
| Sample size                                    | 12       | How many participants were in the study?                                                                                                                 |                      |
| Non-participation                              | 13       | How many people refused to participate or dropped out? Reasons?                                                                                          |                      |
| <i>Setting</i>                                 |          |                                                                                                                                                          |                      |
| Setting of data collection                     | 14       | Where was the data collected? e.g. home, clinic, workplace                                                                                               |                      |
| Presence of non-participants                   | 15       | Was anyone else present besides the participants and researchers?                                                                                        |                      |
| Description of sample                          | 16       | What are the important characteristics of the sample? e.g. demographic data, date                                                                        |                      |
| <i>Data collection</i>                         |          |                                                                                                                                                          |                      |
| Interview guide                                | 17       | Were questions, prompts, guides provided by the authors? Was it pilot tested?                                                                            |                      |
| Repeat interviews                              | 18       | Were repeat interviews carried out? If yes, how many?                                                                                                    |                      |
| Audio/visual recording                         | 19       | Did the research use audio or visual recording to collect the data?                                                                                      |                      |
| Field notes                                    | 20       | Were field notes made during and/or after the interview or focus group?                                                                                  |                      |
| Duration                                       | 21       | What was the duration of the interviews or focus group?                                                                                                  |                      |
| Data saturation                                | 22       | Was data saturation discussed?                                                                                                                           |                      |
| Transcripts returned                           | 23       | Were transcripts returned to participants for comment and/or                                                                                             |                      |

| Topic                                  | Item No. | Guide Questions/Description                                                                                                        | Reported on Page No. |
|----------------------------------------|----------|------------------------------------------------------------------------------------------------------------------------------------|----------------------|
|                                        |          | correction?                                                                                                                        |                      |
| <b>Domain 3: analysis and findings</b> |          |                                                                                                                                    |                      |
| <i>Data analysis</i>                   |          |                                                                                                                                    |                      |
| Number of data coders                  | 24       | How many data coders coded the data?                                                                                               |                      |
| Description of the coding tree         | 25       | Did authors provide a description of the coding tree?                                                                              |                      |
| Derivation of themes                   | 26       | Were themes identified in advance or derived from the data?                                                                        |                      |
| Software                               | 27       | What software, if applicable, was used to manage the data?                                                                         |                      |
| Participant checking                   | 28       | Did participants provide feedback on the findings?                                                                                 |                      |
| <i>Reporting</i>                       |          |                                                                                                                                    |                      |
| Quotations presented                   | 29       | Were participant quotations presented to illustrate the themes/findings?<br>Was each quotation identified? e.g. participant number |                      |
| Data and findings consistent           | 30       | Was there consistency between the data presented and the findings?                                                                 |                      |
| Clarity of major themes                | 31       | Were major themes clearly presented in the findings?                                                                               |                      |
| Clarity of minor themes                | 32       | Is there a description of diverse cases or discussion of minor themes?                                                             |                      |

Developed from: Tong A, Sainsbury P, Craig J. Consolidated criteria for reporting qualitative research (COREQ): a 32-item checklist for interviews and focus groups. *International Journal for Quality in Health Care*. 2007. Volume 19, Number 6: pp. 349 – 357

**Once you have completed this checklist, please save a copy and upload it as part of your submission. DO NOT include this checklist as part of the main manuscript document. It must be uploaded as a separate file.**
